# Supplementary material for: Defined enzyme cocktail from the anaerobic fungus Orpinomyces sp. strain C1A effectively releases sugars from pretreated corn stover and switchgrass
Source: PubMed Central journal article supplement (PMC4933900; doi:10.1038/srep29217), 2016-07-06
Supplement: srep29217-s1.pdf [file srep29217-s1.pdf]

Supplemental Information

**Defined enzyme cocktail from the anerobic fungus *Orpinomyces* sp. strain C1A effectively releases sugars from pretreated corn stover and switchgrass**

Authors: Jessica M. Morrison<sup>1</sup>, Mostafa S. Elshahed<sup>1</sup>, and Noha H. Youssef<sup>1\*</sup>

<sup>1</sup>Department of Microbiology and Molecular Genetics, Oklahoma State University, Stillwater, OK, USA

**Supplementary File 1. Protein sequence of all enzymes cloned and expressed in this study.**

>EG5

TLLGLAIIGTKAMRNISSELVKELTIGWSLGNTLDATCFETLNYAKDQTASET CWGNV  
KTTQELYYKLNLDLGFNTFRIPPTWSGHFGDGPDYKISEAWMKRVHEIVDYALNADGYA  
ILNIHETWNHAFQKNLES AKKILVAIWKQIAAEFADYDEHLIFEGMNEPRKVGDAAEW  
NGGDYEGWNFVNEMNDL FVK TIRATGGNNALRHLMIPTYAACVNDGAINNFRFPSPGD  
DKVIVSLHSYSPYNFALNNGAGAINNFNDGSEIDWVMNTINSSFISKGIPVIIIGFEGAMNR  
NNEADREKWAEYYIKKATSLGIPCVIWDNGYFEGEGERFGLIDRKS LNVVYPRLVNGL  
MKGLGDKKPKTTKVRTTTTTTIQVQPTNNNDCFSTKLG YDCCNGCEVFYTDNDGKWG  
VENGNWCG

>Cel6A

PKSSGGSTTTPVNP GDVDATPGDQLT LSGNPFSGVEFYINPYYVAEVDGAIAQMTDSSL  
KAKAEKMKTYSNAIWLDTIKNMNSWLESNLKGALAQQTGSKKVLTVFVVYDLPGRDC  
HALASNGELLANSSDAQRYKTEYIDVIEKHLKTYKSQPVALIVEPDSL ANLVTNLESTPA  
CRDSESYLDGHAYLIK KLGVLP HVAMYLDIGHAFWLGWDDNREKAGKVYAKVIQSG  
SPGKVRGFTDNVSNYTPWEDPTLSRGP DTEWNP CPDEKRYLEAMHKDFKAAGISSVYF  
VSDTSRNGHKTDRKH PGEWCNQTGVGIGAR PQASPISGMDYLDAFYWIKPLGESDGT S  
DESAVRFDGYCGHETAMKPAPEAGQWFQKHFEQLENANPPL

>Cel48

MPSIRTALTLLGASAVIAAPT KRANDAYAQRVIDTYNAV TGNGSYRSDYFSPENVPYHS  
VETMMVEAPDQGHESVSETYSFWWLEANGKMTGNYDGVNTAWSYLEKHIIPDSKN  
QPGMSRYNSSSPATYAPEDDDITNYP SKLIFQDGLVGQDPIAAELQQA YGTWDIYAMH  
WIIDGDNWYGYGQQGDGTTKPSFINTFQRGPSESAWKTVP HPCWEEFKWGGRNGFLDL  
FTVDNSYAKQWRYTAAPDADARAIQAAYFAYIWAKEDGQNLSSLAGKAAKLG DYLR Y  
AHYDKYFKKIGNCIGYQQCQAGSGKNSAHYLISWYFSWGGGLQGDWSWRIGSSHTHT  
GYQNPLAAWVLSTESAFKPKGSTAVKDWATSLDRQLELFRWLQAAEGCIAGGATNSW  
QGHYAQPSPDITSFYGMYYDWQPVYHDPSPN NWTGMQGWGMERVCSLYFLSGNEKA  
GKVCQDWAKWVKNNVRVNGSEVVHATNFSWSGNPDEWK PANFNKSGLNASLHGTVS  
TEGIDIGSLASIIKGLMWVSMKDG DQEGIDLA VQVMDAIEQYRDDHGYGVEEAREDYA  
KFNEEVYIPSGWTGKNAQGANIRNGVKFIDIRPKYKQDPDWPQIENFLNGGEAPRFTYH  
RFAWAQTEIAVANGLISYGLSDGSGVVP TPKPGSCAAA IKAQGYKCCSANCEVVYTDADG  
DWGVENDEWCGCGGGEPECPAAITNQGYPCCSTCGTVYYT DGDGDWGVENGDWCG  
MPTDC

>XYL11

GSGTSGTADFPYAKVYIGNQQNQPSYQPTTTRNNSQPTSPATGGSSGEIC SASGHSGEST  
KVTSNKVGSINGIGYELWADSGNNSATFYSDGSFCTFQNAKDYL CRSGLSFDSTKTHS  
QIGHLYADFKLVKQGISNV DYSYVGIYGWTRSPLVEFYIVDNWLSQYRPGDWVGNKKH  
GDFTIDGAQYTVYENTRTGPSIDGNTQFKQYFSIRKTARDCGTIDITAHFQQWEKLGMT  
MGKMHEAKVLGEAGSNGSGTSGTADFPYAKVYTGSSSNASSNNASSNNNNNNSSN  
NSSNSNCAARWAQCGGNGFN GAKCCKEGTCVQMNQWYSQCQ

>BGL1

FATLLAASAACKCIVKPAADAAADVASDAEVSASDEENPLDNGEDSADDTPKGKLP  
FKWGAATAAYQVEGAWNEEGRGESVWDHFTLHPKNVESGDRSNKDSTNGNVACDS  
YHKFDEDIKMMKIMNANHYRFSISWSRLFPDGQAKKVDGEWNVNEAGAQQYYDMVIDT  
LLDNDIIPLATLYHWDLPYALHEKYGGWLDYHSQDFAKYAEFCFERYGDRVKGWITI  
NEPWVNCVAGYKNGPGKAPYRCTGEAPRKLANDTTGLDLEGGCSYEIGPSQYTKDSEV  
LPANRPPQKLEDVWCSHNILLGHAQAVKVYREKFKQKEQKGLIGITIDGEAQIPWEEPGM  
SEEEYENNKKYANLAAEFRIGWYSDPVMFGDYPEVSVKQRNGKDMVFTDEEKKLLKGS  
SSDFLGWNTYTSHWAAQVKNEDGSYVEPPTDEEASYDNSKRDMWDDNCKGRGDGWT  
CIPPTLGSQAGSSWNTKYGPTIRVGLNWFSKRYEGIIKNGIITENGCAQPNYKVS RANDQ  
VTLDYWKSIGKEEFADTYDEDIIEDESLEGLTIHDTYRIDWYKQYLENRLAYVEDGV  
DVRGYMAWSLVDFEWENGYETFRGMTYIDFYNDKDLKRVPKDSL TFLGQWYLDNV  
EQE

>BGL3

MKFSSVLSTVALLFVSKSLAITWEEADAKAREWCSDLTNEEKIALITGRENMTGVCVGS  
DPIERKGFKGLCLQDGPAGVRFKGTATSWQASINTAATFDRTLLRKVGEAQGNEFYQ  
RGINVALAPSMGIQRAPAAGRIFESYGEDPFYVVGQCGLEV LKGIQSQGVIANAKHYIAND  
QENNRGASTSNVPEQALWEVYMEPFYRTVVEGEAGTVMASYNAINGTYSTQNKRLT  
DYLKGGKLGFKGFVMSDWWAIFDVEKSFNGTDMNMPGGKYWGPDYVGDSFWGEHIQ  
ECIDNGVFPQERLDDAVLRIIRTLYKLDQMDDYPEVNLYVDTNTKENAALNRKVGADS  
NVLLKNADNILPIKSKKVKKIAVIGKDSMPPTLCEDMKCANGTLPLGWGSGTTDFKYV  
VDPLSAITKRAKSKISVVSYGEDDAKKA AKVAKKADVAVFVQADS GEEYITVEGNA  
GDRLNLDLWHGGNELIEAVAAVNKNTIVVIHAPGPVNPFLDKVKGIIFAGLPGQETGN  
AITDVLFGDVNPSGHLPYTWAPREDYPTDVKYEPEYDPDGGEKMTVYDYNEGLFVGYR  
WFDKKEIPTAFGYGLSYTTFEFSLEATMEDDGLYVSLTVTNTGKVAGAAVPMIFLSF  
PESVKYPIRLFKGFDKVMLKAGESKETTIFIDAHGLSYFDVEKMEYVRPKDGEFTVYAG  
SNARDLPLNVKVLANGDEIDSDNDNSDEEINEDIEDVEDSSDDEDEKDLKKRFYKLY

>Swol

MKSIQALGLSLLIAGTYAKCQTGYECCKTCDVSYTDDDGEWGIEDGQWCGIDTEKCNK  
SGDDTPVTSECWSKELGFDCKSTTEVVAADASGK WGVENDQWCGIIESSATEDSCGA  
YPCCKTCDSTYEDEDGKWAIENGDWCLLKKSCGDKPVDSTTTKATEPTTKSSGGVSRT  
TLADGGILESGVFSTLPPSHTQPPYPHAENTGLASGAKWTLVDNVCVAMYCEDDLSE  
NCDECGGVAGENGCVSVDPALCKSGIWPEVHDASDQPWKYSRSTHFGLTYGGACGFG  
LYGLCTPKFNETGELCQRFCEHYPDLCADPEDISLRGNFCAPNGNYTQFWSSSLPGDYD  
NYLSCGECYEVERTLPDGSSYPEGEKTDNIIQVLDSCPCTANAKWCCGSGTDHCNEIDF  
KYGCPPEESFHVDLSDIAMSRLQTNDPY GEMREGVPIKYKRVPCPVKGNIHVWLRPGA  
GPWYFALTVVNVANMGSLVAVEVQQADGK WVPLVRDPNYSSTRPQERYGSWTVKQG  
TGFETPMNMRFDSAFNTLTAENAIKDWGDPDFDMDFLYIDTGVQFPMP

>Bgxl

MKSLSLFFAYVLLVTPYLLVKATNVLTVECNKLRRATHCANGSLYGITETTPRDYKSL  
VDPLHPFVMRNPARGGNGNQHYPYGDAIKVARRLADTPGALVSVDLPDMLPGWPYRWP  
GMQSWLNQVKS FINDKKASGLKNWYGLEIWNPDGTWNNNSNGSFEEMWKQTYQVIR  
QADPNEKIIGPCYSWYTDDKLRNFLKYAKANNCLPDIISWHELSGIDGVSSHLRSYREIE

KSLGIPELPISINEYCDAEHELEGQPGSSARFIGKFERYKVDTAMITWWFVYPYPGRLGSL  
ATDTQKGAGWYFYKWYGDMTGDMLYVKPPDNSKLV DGAACL

**Table S1. Compositional analysis of pretreated corn stover and switchgrass.**

| Plant       | Pretreatment | Glucan (%) | Hemicellulose (%) | Xylan (%) | Lignin (%) |
|-------------|--------------|------------|-------------------|-----------|------------|
| Corn stover | Untreated    | 45         | 36                | 30        | 18         |
|             | Alkali       | 55         | 34                | 28        | 9          |
|             | Acid         | 42         | 25                | 22        | 33         |
|             | Ionic Liquid | 31         | 26                | 17        | 43         |
| Switchgrass | Untreated    | 40         | 38                | 30        | 23         |
|             | Alkali       | 48         | 34                | 30        | 18         |
|             | Acid         | 56         | 13                | 13        | 31         |
|             | Ionic Liquid | 33         | 33                | 28        | 35         |

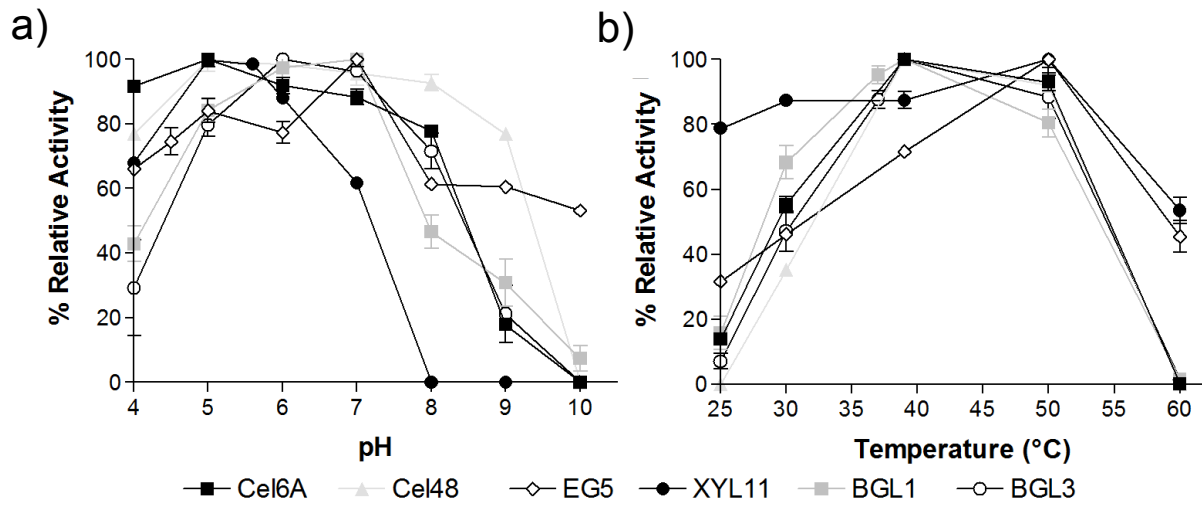

**Figure S1. Optimal enzyme conditions. a) Optimal pH and b) Optimal Temperature.** For all graphs, all values presented as relative specific activities. Error bars represent standard deviation of triplicate (n=3) samples.

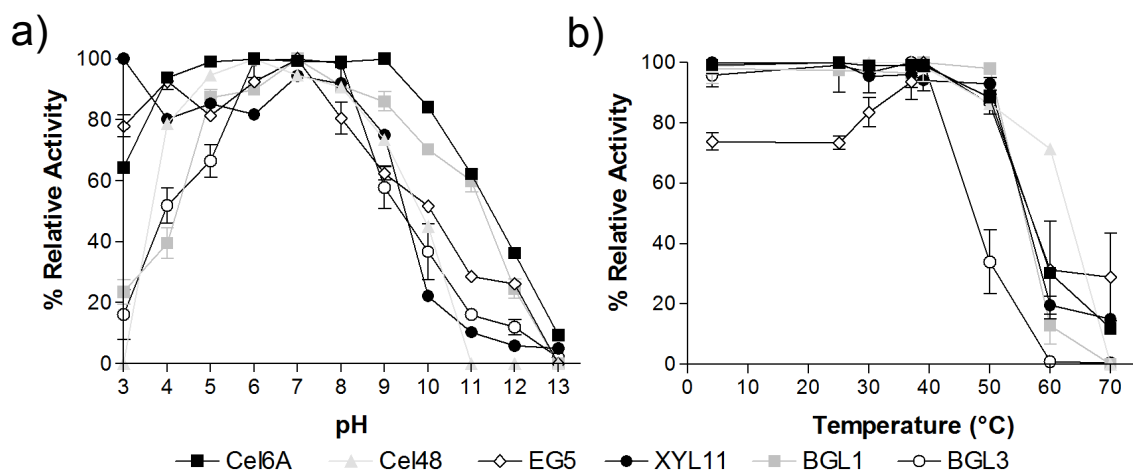

**Figure S2. Enzyme stability. a) pH stability and b) thermal stability.** For all graphs, all values presented as relative specific activities. Error bars represent standard deviation of triplicate (n=3) samples.

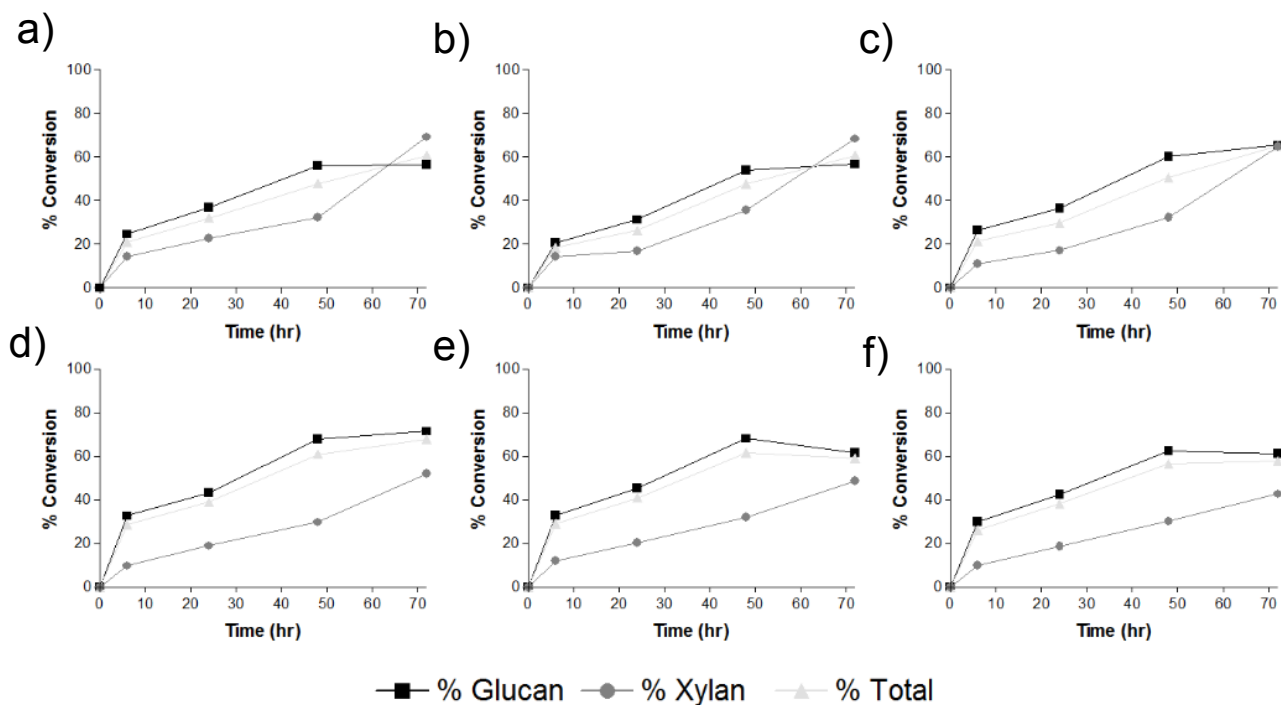

**Figure S3. Enzymatic cocktail design examining ratios of cellulose-degrading cocktail and xylan-degrading cocktail on acid-pretreated corn stover (a-c) and switchgrass (d-f).**

Cel6A:EG5:Bgxg1:XYL11 ratios are as follows: **a** and **d**: 30:10:25:35; **b** and **e**: 40:13:23:24; and **c** and **f**: 20:7:27:46.



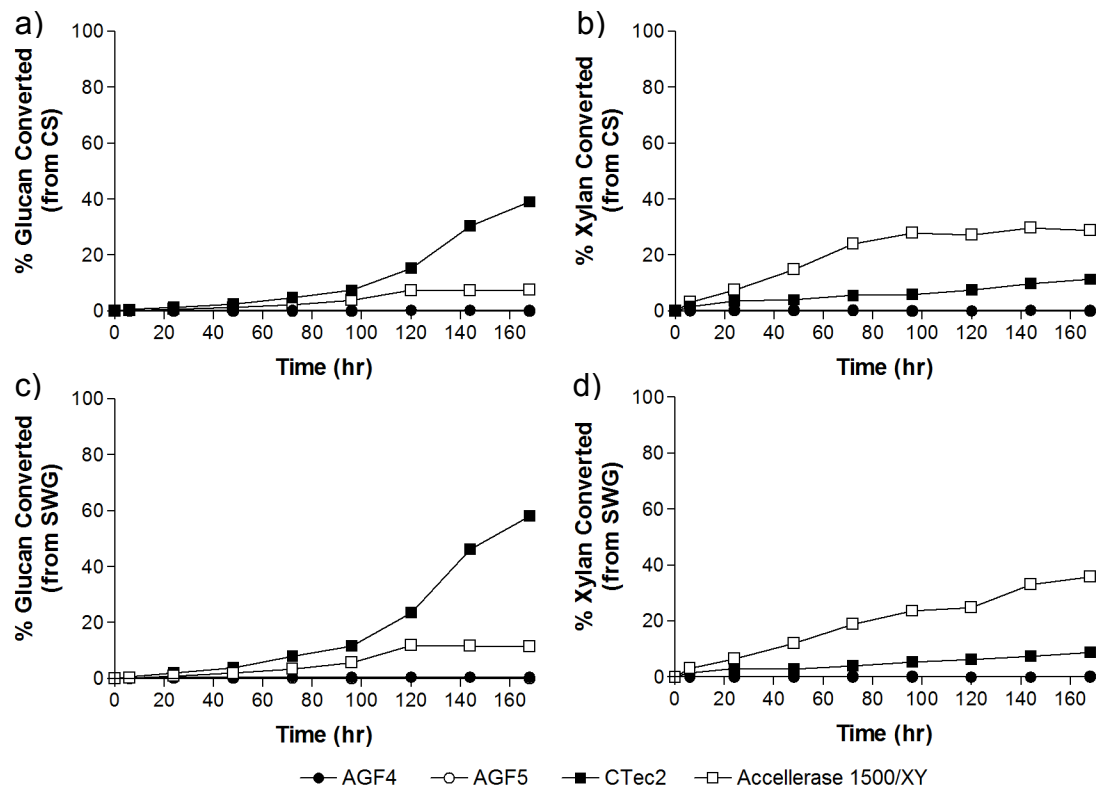

**Figure S4. Enzymatic cocktails performance against untreated corn stover (a - glucan, b - xylan), and switchgrass (c - glucan, d - xylan).**

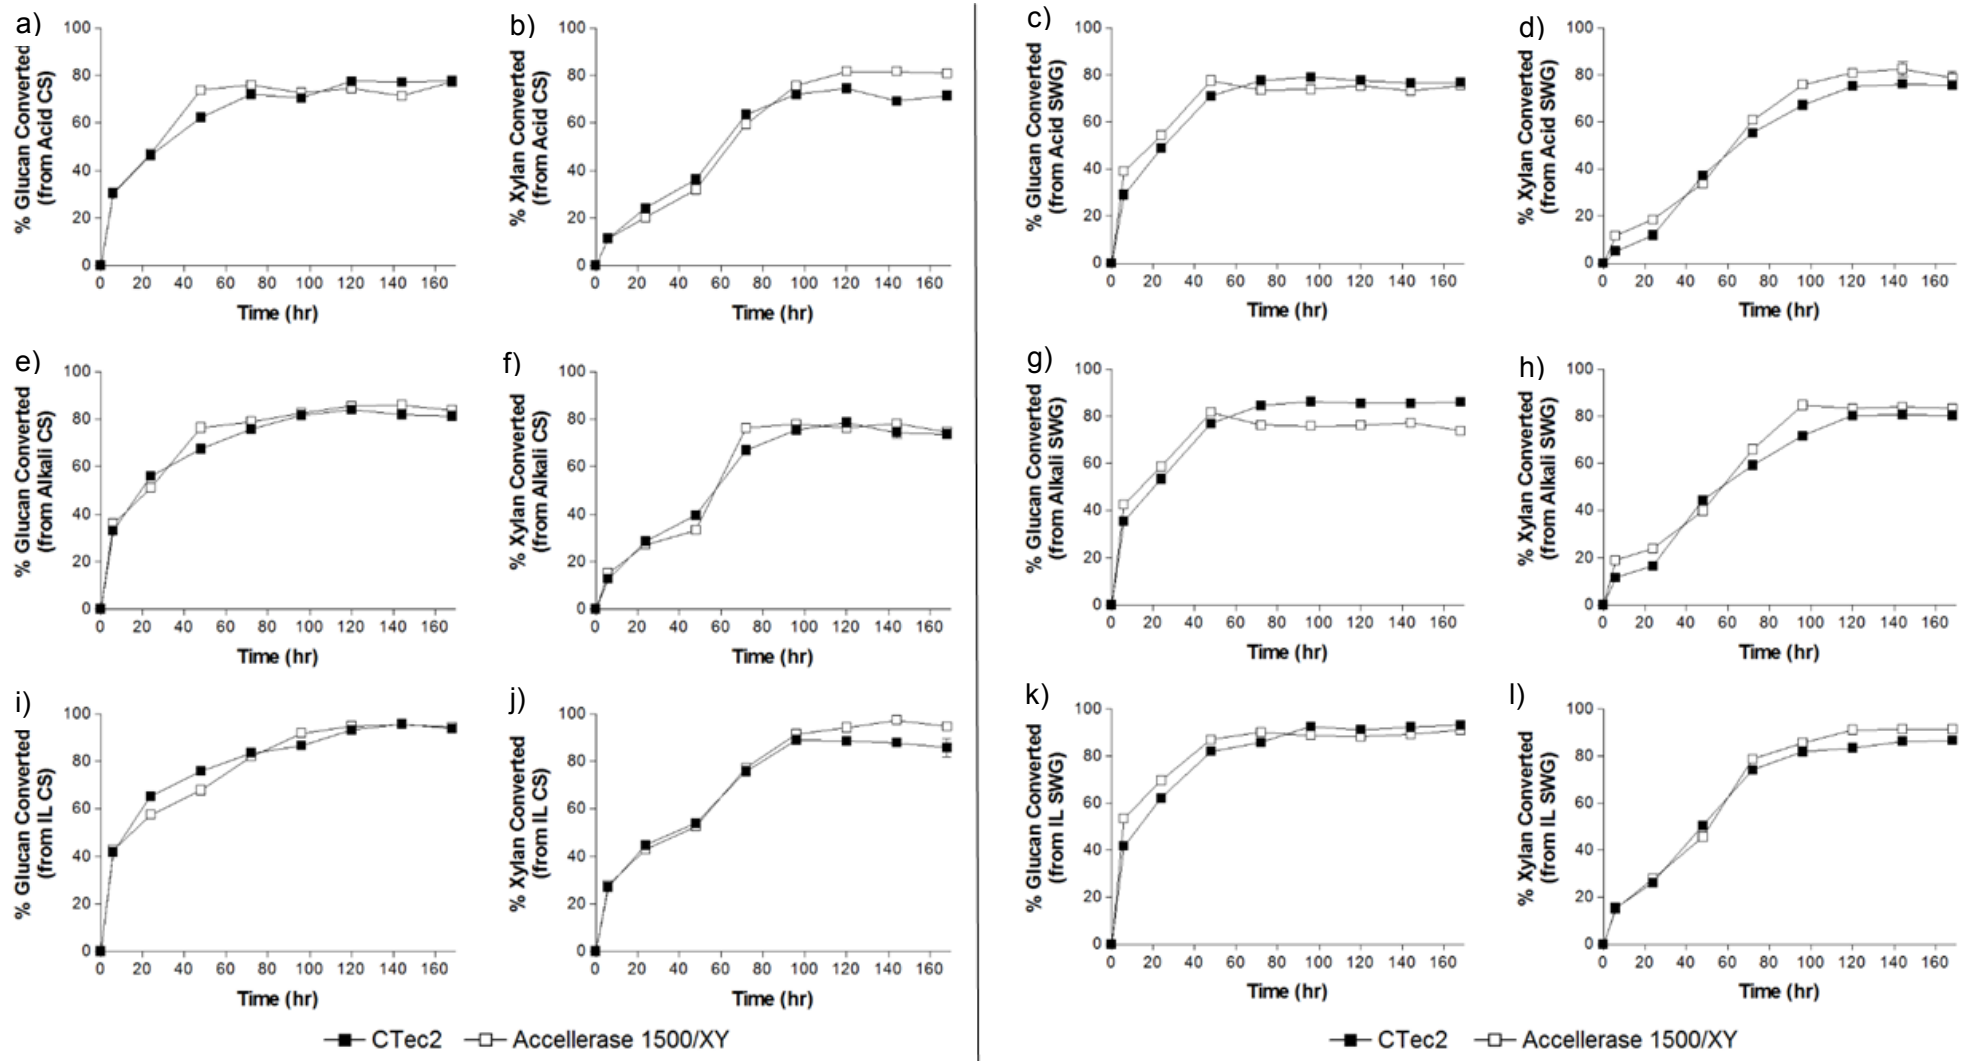

Figure S5. Commercial enzyme preparations (CTec2 and Accellerase 1500/XY) tested on various pretreatments of corn stover (CS) and switchgrass (SWG). a-b) Acid-treated corn stover, c-d) Acid-treated switchgrass, e-f) Alkali-treated corn stover, g-h) Alkali-treated switchgrass, i-j) Ionic-liquid-treated corn stover, k-l) Ionic-liquid-treated switchgrass. For a, c, e, g, i, k, the percentage of glucan converted is shown. For b, d, f, h, j, l, the percentage of xylan converted is shown.

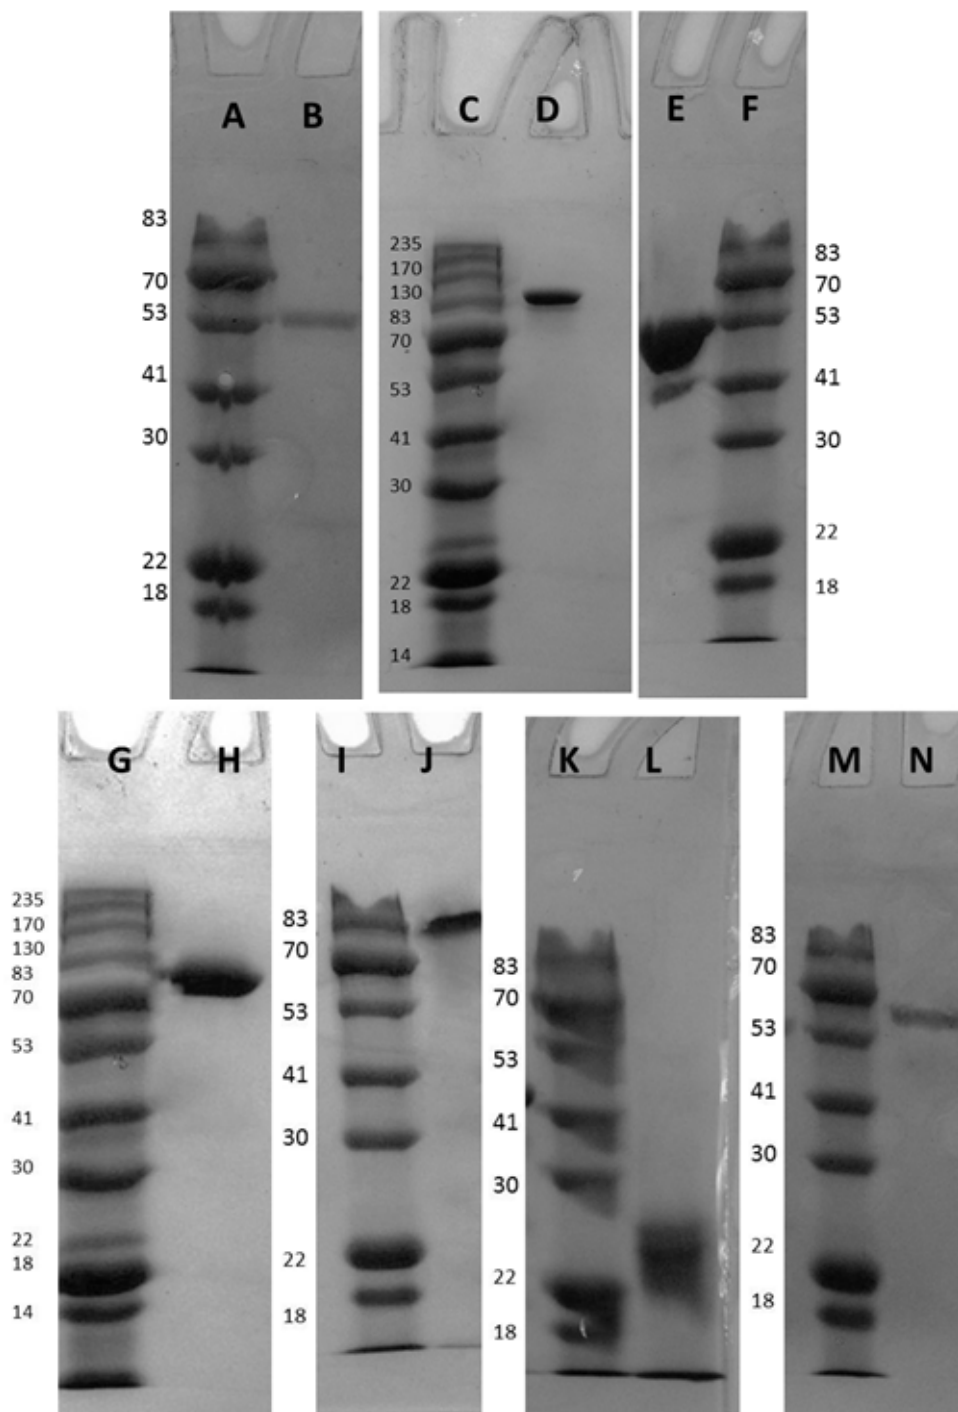

**Figure S6. SDS-PAGE analysis of proteins.** 12.5% SDS-PAGE analysis of recombinant proteins. *Lane A, C, F, G, I, K, and M:* Pre-stained Protein Ladder (Caisson Labs, Smithfield, Utah). *Lane B:* Cel6A, ~55 kDa; *Lane D:* Cel48, ~86 kDa; *Lane E:* EG5, ~49 kDa; *Lane H:* BGL1, ~75 kDa; *Lane J:* BGL3, ~80 kDa; *Lane L:* XYL11, ~25 kDa; *Lane N:* Swol, ~67 kDa. Protein molecular weights shown are consistent with the predicted protein size with linker and double-histidine tag.

**Table S2. Properties of enzymes with exoglucanase activity** All values listed are from enzymatic activities against Avicel. “-“, not reported in the study. Rows of anaerobic fungi are highlighted.

| Origin                            | Protein Name (Annotation) | Specific Activity (U/mg) | Kinetics Km (mg/mL) | Kinetics Vmax (U/mg) | Optimal pH | pH Stability | Optimal Temp. (°C) | Temp. Stability (°C) | Other Activities                                    | Ref.       |
|-----------------------------------|---------------------------|--------------------------|---------------------|----------------------|------------|--------------|--------------------|----------------------|-----------------------------------------------------|------------|
| <i>Orpinomyces</i> sp. strain C1A | Cel6A                     | 2.03                     | 0.00476             | 73.5                 | 5          | 4-10         | 39                 | 4-50                 | Cellobiohydrolase                                   | This Study |
|                                   | Cel48                     | 0.20                     | 1.257               | 0.218                | 5          | 4-9          | 39                 | 4-60                 | Cellobiohydrolase<br>Endoglucanase                  | This Study |
| <i>Aspergillus nidulans</i>       | Exo-I                     | 0.348                    | 50                  | 0.8                  | 5.5        | -            | 50                 | -                    | None                                                | 1          |
|                                   | Exo-II                    | 0.785                    | 38.4                | 1.3                  | -          | -            | -                  | -                    | None                                                | 1          |
|                                   | Exo-III                   | 0.296                    | 37.7                | 0.2                  | -          | -            | -                  | -                    | None                                                | 1          |
| <i>Chrysosporium lucknowense</i>  | EG25                      | 0.05                     | -                   | -                    | 4.5-6      | 5-8.5        | 60-70              | 60-75                | Endoglucanase                                       | 2          |
|                                   | EG28                      | 0.02                     | -                   | -                    | 4.5-6      | 5-7          | 60-70              | 60-75                | Endoglucanase                                       | 2          |
|                                   | EG44                      | 0.06                     | -                   | -                    | 4.5-6      | 5-7          | 60-70              | 60-75                | Endoglucanase<br>Xylanase                           | 2          |
|                                   | EG47                      | 0.07                     | -                   | -                    | 4.5-6      | 5-8.5        | 60-70              | 60-75                | Endoglucanase<br>Xylanase                           | 2          |
|                                   | EG51                      | 0.19                     | -                   | -                    | 4.5-6      | 5-7          | 60-70              | 60-75                | Endoglucanase<br>Xylanase                           | 2          |
|                                   | EG60                      | 0.08                     | -                   | -                    | 4.5-6      | 5-7          | 60-70              | 60-75                | Endoglucanase<br>β-glucosidase                      | 2          |
|                                   | CBHI                      | 0.19                     | -                   | -                    | 4.5-6      | 5-7          | 60-70              | 60-75                | Cellobiohydrolase<br>Endoglucanase<br>β-glucosidase | 2          |
|                                   | CBHII                     | 0.08                     | -                   | -                    | 4.5-6      | 5-7          | 60-70              | 60-75                | Endoglucanase<br>Cellobiohydrolase                  | 2          |
| <i>Fusarium oxysporum</i>         | Xylanase                  | 0.02                     | -                   | -                    | 7.4        | 6-8          | 50                 | to 50                | Endoglucanase<br>Xylanase                           | 3          |
| <i>Fusarium solani</i>            | Cellulase                 | 1.34                     | -                   | -                    | 5          | 5-7          | 65                 | to 65                | β-glucosidase                                       | 4          |
| <i>Gloeophyllum trabeum</i>       | Cel5A                     | 0.0045                   | -                   | -                    | -          | -            | -                  | -                    | Endoglucanase                                       | 5          |
|                                   | Xyn10A                    | 0.0018                   | -                   | -                    | -          | -            | -                  | -                    | Xylanase                                            | 5          |
| <i>Humicola grisea</i>            | Exoglucanase I            | 0.00128                  | -                   | -                    | 6-8        | 4-14         | 55-70              | 30-75                | β-glucosidase<br>Endoglucanase<br>Cellobiohydrolase | 6          |
| <i>Neocallimastix patricianum</i> | CelA                      | 1.1                      | -                   | -                    | 6          | 5.2-11.3     | 50                 | to 70                | Endoglucanase                                       | 7          |
|                                   | CelA                      | 26.8                     | -                   | -                    | -          | -            | -                  | -                    | Endoglucanase                                       | 8          |
|                                   | CelB                      | 1.4                      | -                   | -                    | -          | -            | -                  | -                    | Endoglucanase<br>Cellobiohydrolase                  | 8          |
|                                   | CelC                      | 0.9                      | -                   | -                    | -          | -            | -                  | -                    | Endoglucanase                                       | 8          |
|                                   | CelD                      | 0.18                     | -                   | -                    | -          | -            | -                  | -                    | Endoglucanase                                       | 9          |

|                                |                |         |        |     |         |         |       |               | Cellobiohydrolase    |               |
|--------------------------------|----------------|---------|--------|-----|---------|---------|-------|---------------|----------------------|---------------|
| <i>Orpinomyces joyonii</i>     | CelA           | 0.12    | -      | -   | 4       | 3-7     | 40    | to 50         | Endoglucanase        | 10            |
| <i>Orpinomyces</i> sp. PC-2    | CelA           | 0.062   | -      | -   | 4.8     | 4.3-6.8 | 50    | to 40         | Endoglucanase        | 11            |
|                                | CelC           | 0.113   | -      | -   | 5.6-6.2 | 4.6-7   | 40    | to 40         | Endoglucanase        | 11            |
| <i>Orpinomyces</i> sp. Y102    | CelC7          | 20.27   | -      | -   | 6.5     | 4-11    | 40    | 30-50         | Endoglucanase        | 12            |
| <i>Penicillium brasilianum</i> | EGa            | 0.04    | -      | -   | -       | -       | -     | -             | Endoglucanase        | 13            |
|                                | EGb1           | 0.02    | -      | -   | -       | -       | -     | -             | Endoglucanase        | 13            |
|                                | EGb2           | 0.06    | -      | -   | -       | -       | -     | -             | Endoglucanase        | 13            |
|                                | CBHa           | 0.11    | -      | -   | -       | -       | -     | -             | Cellobiohydrolase    | 13            |
|                                | CBHb           | 0.07    | -      | -   | -       | -       | -     | -             | Cellobiohydrolase    | 13            |
| <i>Penicillium funiculosum</i> | Cellulase      | -       | 172    | -   | 5       | -       | 50    | to 60         | $\beta$ -glucosidase | 14            |
|                                |                |         |        |     |         |         |       |               | Cellobiohydrolase    |               |
| <i>Pichia pastoris</i>         | EXG1           | 1.07    | 3.5    | 192 | -       | -       | -     | -             | $\beta$ -glucosidase | 15            |
|                                |                |         |        |     |         |         |       |               | $\beta$ -xylosidase  |               |
| <i>Piromyces rhizinflatus</i>  | CbhYW23-2      | 6.2     | -      | -   | 6       | -       | 46.4  | to 50         | Endoglucanase        | 16            |
| <i>Piromyces</i> sp. E2        | Cel6A          | 0.0053  | -      | -   | -       | -       | -     | -             | Cellobiohydrolase    | 17            |
| <i>Termitomyces</i>            | Cellulase IF   | 24.6    | -      | -   | 4.4     | 3-5.5   | 55    | to 42         | Endoglucanase        | 18            |
| <i>Trichoderma harzianum</i>   | EXG            | 49.2    | -      | -   | 5.5     | -       | 28    | -             | $\beta$ -glucosidase | 19            |
|                                |                |         |        |     |         |         |       |               | Endoglucanase        |               |
|                                | Cellulase      | 130     | -      | -   | 4-5     | -       | 37-40 | to 40         | None                 | 20            |
| <i>Trichoderma neapolitana</i> | CelB           | 0.71    | -      | -   | 6-6.6   | -       | 106   | to 106        | Cellobiohydrolase    | 21            |
| <i>Trichoderma reesei</i>      | CBHII          | 0.001   | -      | -   | -       | -       | -     | -             | Cellobiohydrolase    | 22            |
|                                | EGI            | 0.4     | -      | -   | -       | -       | -     | -             | Endoglucanase        | 22            |
|                                | XYL9           | 0.00005 | -      | -   | -       | -       | -     | -             | Xylanase             | 22            |
|                                | XYL5.5         | 0.00005 | -      | -   | -       | -       | -     | -             | Xylanase             | 22            |
|                                | CBHI           | 0.0105  | -      | -   | 4       | 2-10    | 60    | to 50         | Cellobiohydrolase    | 23            |
|                                | CBHII          | 0.0205  | -      | -   | 5       | 3-8     | 55    | to 50         | Cellobiohydrolase    | 23            |
|                                | EGI            | 0.014   | -      | -   | 4       | 2-8     | 60    | to 45         | Endoglucanase        | 23            |
|                                |                |         |        |     |         |         |       |               | Xylanase             |               |
|                                |                |         |        |     |         |         |       |               | Cellobiohydrolase    |               |
|                                |                | EGIII   | 0.0116 | -   | -       | 4       | 2-6   | 70            | to 55                | Endoglucanase |
|                                | CBH I          | 0.014   | -      | -   | -       | -       | -     | -             | Cellobiohydrolase    | 24            |
|                                | CBH II         | 0.027   | -      | -   | -       | -       | -     | -             | Cellobiohydrolase    | 24            |
| <i>Trichoderma viride</i>      | Cel7B (EG I)   | 0.8     | -      | -   | -       | -       | -     | -             | Cellobiohydrolase    | 25            |
|                                |                |         |        |     |         |         |       |               | Endoglucanase        |               |
|                                | Cel2A (EG III) | 0.4     | -      | -   | -       | -       | -     | -             | Cellobiohydrolase    | 25            |
|                                |                |         |        |     |         |         |       |               | Endoglucanase        |               |
|                                | Cel61A (EG IV) | 0.3     | -      | -   | -       | -       | -     | -             | Cellobiohydrolase    | 25            |
|                                |                |         |        |     |         |         |       | Endoglucanase |                      |               |
|                                | Cel7A (CBH I)  | 0.3     | -      | -   | -       | -       | -     | -             | Cellobiohydrolase    | 25            |
|                                |                |         |        |     |         |         |       | Endoglucanase |                      |               |
|                                | Cel6A (CBH II) | 0.7     | -      | -   | -       | -       | -     | -             | Cellobiohydrolase    | 25            |
|                                |                |         |        |     |         |         |       | Endoglucanase |                      |               |

|                                    |                 |         |     |    |         |        |       |       |                                                |       |
|------------------------------------|-----------------|---------|-----|----|---------|--------|-------|-------|------------------------------------------------|-------|
|                                    | Cel6B (CBH IIb) | 0.2     | -   | -  | -       | -      | -     | -     | Cellobiohydrolase<br>Endoglucanase             | 25    |
| <i>Anaerocellum thermophilum</i>   | CelA            | 0.055   | -   | -  | 5-6     | -      | 85-95 | -     | Endoglucanase                                  | 26    |
| <i>Bacillus amyoliquefaciens</i>   | Cellulase       | 14      | -   | -  | 7       | 4-9    | 50    | 40-80 | Endoglucanase<br>Cellobiohydrolase<br>Xylanase | 27    |
| <i>Bacillus</i> sp.                | CH43            | 0.001   | -   | -  | 5-6.5   | 6-10   | 65    | to 50 | Endoglucanase                                  | 28    |
|                                    | HR68            | 0.0063  | -   | -  | 5-6.5   | 6-8    | 70    | to 50 | Endoglucanase                                  | 28    |
|                                    | E-H             | 1.1     | -   | -  | -       | -      | -     | -     | Endoglucanase                                  | 29    |
|                                    | E-L             | 1.1     | -   | -  | -       | -      | -     | -     | Endoglucanase                                  | 29    |
|                                    | Cel             | 0.014   | -   | -  | -       | -      | -     | -     | Cellobiohydrolase                              | 30    |
| <i>Bacillus sphaericus</i>         | Cellulase       | 5.76    | -   | -  | 8       | 7-10.5 | 60    | to 70 | Endoglucanase                                  | 31    |
| <i>Bacillus subtilis</i>           | Cellulase       | 2380    | -   | -  | 6       | 6-7.5  | 50-60 | to 50 | Endoglucanase                                  | 32    |
| <i>Caldibacillus cellulovorans</i> | CMCase          | 1.7     | -   | -  | 6.5-7   | -      | 80    | to 70 | Endoglucanase                                  | 33    |
| <i>Cellulomonas fimi</i>           | Cex             | 0.00016 | -   | -  | -       | 6-9    | -     | -     | Endoglucanase                                  | 34-36 |
|                                    | CenA            | 0.00218 | -   | -  | -       | -      | -     | -     | Endoglucanase                                  | 36    |
|                                    | CenB            | 0.00222 | -   | -  | -       | -      | -     | -     | Endoglucanase                                  | 36    |
|                                    | CenC            | 0.00099 | -   | -  | -       | -      | -     | -     | Endoglucanase                                  | 36    |
|                                    | CenD            | 0.00242 | -   | -  | -       | -      | -     | -     | Endoglucanase                                  | 36    |
| <i>Clostridium cellulolyticum</i>  | CelF            | 0.0134  | 2.4 | -  | 5.5-6   | -      | 55    | 20-45 | Endoglucanase                                  | 37    |
| <i>Clostridium stercorarium</i>    | Avicelase II    | 0.041   | -   | -  | 5-6     | 4.5-7  | 75    | 65-80 | None                                           | 38    |
| <i>Clostridium thermocellum</i>    | CelJ            | 0.0098  | -   | -  | 6       | 5-10   | 60    | to 70 | None                                           | 39    |
|                                    | CelS            | 0.019   | -   | -  | 5-6     | -      | 70    | -     | None                                           | 40    |
|                                    | Endoglucanase   | 0.17    | -   | -  | 5.2     | 4.5-7  | 62    | to 70 | Endoglucanase                                  | 41    |
| <i>Pseudomonas fluorescens</i>     | Cellulase       | 6.9     | 5.3 | 10 | 6.5-7   | 5.8    | 35    | to 50 | None                                           | 42    |
| <i>Ruminococcus flavefaciens</i>   | Exo A           | 0.049   | -   | -  | 5       | 5-5.5  | -     | -     | None                                           | 43    |
| <i>Streptomyces flavogriseus</i>   | Exoglucanase    | 0.019   | -   | -  | -       | -      | -     | -     | None                                           | 44    |
| <i>Macrotermes mulleri</i>         | Cellulase IT    | 21      | -   | -  | 4.4     | 3-5.5  | 55    | to 42 | Endoglucanase                                  | 18    |
|                                    | Cellulase II    | 36.2    | -   | -  | 4.3-4.5 | 3-5.5  | 37    | to 42 | Endoglucanase                                  | 18    |

**Table S3. Properties of enzymes with cellobiohydrolase activity.** Table is organized by origin, fungal, then bacterial, then plant. All values listed are from enzymatic activities against *p*-nitrophenyl- $\beta$ -D-cellobioside, PNPC. “-”, not reported in the study. Rows of anaerobic fungi are highlighted.

| Origin                            | Protein Name (Annotation) | Specific Activity (U/mg) | Kinetics Km (mM) | Kinetics Vmax (U/mg) | Optimal pH | pH Stability | Optimal Temp. (°C) | Temp. Stability (°C) | Other Activities                                                      | Ref.       |
|-----------------------------------|---------------------------|--------------------------|------------------|----------------------|------------|--------------|--------------------|----------------------|-----------------------------------------------------------------------|------------|
| <i>Orpinomyces</i> sp. strain C1A | Cel6A                     | 2.82                     | 0.228            | 3.27                 | 5          | 4-10         | 39                 | 4-50                 | Exoglucanase                                                          | This Study |
|                                   | Cel48                     | 0.36                     | 8.98             | 0.357                | 5          | 4-9          | 39                 | 4-60                 | Exoglucanase<br>Endoglucanase                                         | This Study |
| <i>Acremonium persicinum</i>      | $\beta$ -glucosidase      | 0.00075                  | 0.91             | -                    | 5.5        | -            | -                  | -                    | $\beta$ -glucosidase                                                  | 45         |
| <i>Candida peltata</i>            | $\beta$ -glucosidase      | 36.7                     | 66               | 75                   | 5          | 3.5-6        | 50                 | 25-45                | $\beta$ -glucosidase                                                  | 46         |
| <i>Chaetomium cellulolyticum</i>  | Xylanase 3                | 0.1                      | -                | -                    | 6-7        | -            | 50                 | -                    | Xylanase<br>Arabinosidase                                             | 47         |
| <i>Gloeophyllum trabeum</i>       | Cel5A                     | 0.065                    | -                | -                    | 6-7        | -            | 50                 | -                    | Endoglucanase<br>Exoglucanase<br>Xylanase                             | 5          |
|                                   | Xyn10A                    | 12                       | -                | -                    | -          | -            | -                  | -                    | Endoglucanase<br>Exoglucanase<br>Xylanase                             | 5          |
|                                   | Cel12A                    | 0.069                    | -                | -                    | -          | -            | -                  | -                    | Endoglucanase<br>Exoglucanase<br>Xylanase                             | 5          |
| <i>Humicola grisea</i>            | Endoglucanase I           | 0.69                     | -                | -                    | 6-7        | 4-12         | 40-60              | 30-65                | Exoglucanase<br>Endoglucanase                                         | 6          |
|                                   | Endoglucanase II          | 0.8                      | -                | -                    | 5-6        | 6-10         | 55                 | 30-55                | Exoglucanase<br>Endoglucanase                                         | 6          |
|                                   | Exoglucanase I            | 8.09                     | -                | -                    | 6-8        | 4-14         | 55-70              | 30-75                | $\beta$ -glucosidase<br>Endoglucanase<br>Exoglucanase                 | 6          |
|                                   | $\beta$ -glucosidase 1    | 0.91                     | -                | -                    | 4-5        | 4-12         | 60-65              | 30-60                | $\beta$ -glucosidase<br>$\beta$ -galactosidase<br>$\beta$ -xylosidase | 6          |
|                                   | $\beta$ -glucosidase 2    | 2.97                     | -                | -                    | 6-8        | 4-12         | 60-65              | 30-50                | $\beta$ -glucosidase<br>$\beta$ -galactosidase<br>$\beta$ -xylosidase | 6          |
|                                   | $\beta$ -glucosidase 3    | 3.19                     | -                | -                    | 6-8        | 4-12         | 60-65              | 30-50                | $\beta$ -glucosidase<br>$\beta$ -galactosidase<br>$\beta$ -xylosidase | 6          |
|                                   | $\beta$ -glucosidase 4    | 1.8                      | -                | -                    | 6-7        | 4-12         | 50-55              | 30-50                | $\beta$ -glucosidase<br>$\beta$ -galactosidase<br>$\beta$ -xylosidase | 6          |
|                                   | $\beta$ -glucosidase 5    | 3.45                     | -                | -                    | 6          | 4-12         | 60                 | 30-55                | $\beta$ -glucosidase                                                  | 6          |

|                                    |                          |         |      |     |       |         |       |       |                                                                                                                        |    |
|------------------------------------|--------------------------|---------|------|-----|-------|---------|-------|-------|------------------------------------------------------------------------------------------------------------------------|----|
|                                    | $\beta$ -glucosidase 6   | 3.72    | -    | -   | 6-7   | 4-12    | 65-70 | 30-65 | $\beta$ -galactosidase<br>$\beta$ -xylosidase<br>$\beta$ -glucosidase<br>$\beta$ -galactosidase<br>$\beta$ -xylosidase | 6  |
|                                    | BGL 4                    | 1.8     | -    | -   | 6     | 6-11    | 55    | to 50 | $\beta$ -glucosidase<br>$\beta$ -galactosidase                                                                         | 48 |
| <i>Neocallimastix patricianum</i>  | CelB                     | 1.31    | -    | -   | -     | -       | -     | -     | Endoglucanase                                                                                                          | 8  |
|                                    | CelD                     | 0.169   | -    | -   | -     | -       | -     | -     | Exoglucanase<br>Endoglucanase<br>Exoglucanase                                                                          | 9  |
| <i>Orpinomyces joyonii</i>         | CelB2                    | 4.9     | -    | -   | 5.5   | 5-7.5   | 40    | to 50 | Endoglucanase                                                                                                          | 49 |
| <i>Orpinomyces</i> sp. PC-2        | CelE                     | 0.2     | -    | -   | -     | -       | -     | -     | Endoglucanase                                                                                                          | 50 |
| <i>Paecilomyces thermophile</i>    | $\beta$ -glucosidase     | 49.1    | 0.65 | 272 | 6.2   | 5-8.5   | 75    | 65-70 | $\beta$ -glucosidase<br>Exoglucanase                                                                                   | 51 |
| <i>Penicillium brasilianum</i>     | EGa                      | 0.34    | -    | -   | -     | -       | -     | -     | Exoglucanase                                                                                                           | 13 |
|                                    | EGb1                     | 0.38    | -    | -   | -     | -       | -     | -     | Endoglucanase<br>Exoglucanase                                                                                          | 13 |
|                                    | EGb2                     | 1.16    | -    | -   | -     | -       | -     | -     | Endoglucanase<br>Exoglucanase                                                                                          | 13 |
|                                    | CBHa                     | 2       | -    | -   | -     | -       | -     | -     | Endoglucanase<br>Exoglucanase                                                                                          | 13 |
|                                    | CBHb                     | 0.98    | -    | -   | -     | -       | -     | -     | Endoglucanase<br>Exoglucanase<br>Endoglucanase                                                                         | 13 |
| <i>Penicillium funiculosum</i>     | Cellobiohydrolase        | 0.56    | -    | -   | 4-5.5 | 2.5-5.5 | 60    | to 70 | Exoglucanase                                                                                                           | 52 |
|                                    | Cellulase                | -       | 10   | -   | 5     | -       | 50    | to 60 | $\beta$ -glucosidase<br>Exoglucanase                                                                                   | 14 |
| <i>Phanerochaete chrysosporium</i> | $\beta$ -glucosidase     | 33      | -    | -   | 4-5.2 | 4-8     | 25    | to 45 | $\beta$ -glucosidase                                                                                                   | 53 |
| <i>Piromyces equi</i>              | Cel5A                    | 0.1     | -    | -   | 5.1   | 5.1-6.4 | 45    | to 50 | Endoglucanase                                                                                                          | 54 |
| <i>Sporotrichum thermophile</i>    | $\beta$ -glucosidase I   | 1       | 0.83 | -   | 5.4   | 4-6.5   | 65    | to 65 | $\beta$ -glucosidase                                                                                                   | 55 |
| <i>Stachybotrys</i> sp.            | $\beta$ -glucosidase p21 | -       | 2.22 | 59  | 5     | 5-7     | 50    | to 60 | $\beta$ -glucosidase                                                                                                   | 56 |
| <i>Trichoderma koningii</i>        | $\beta$ -glucosidase     | 6.6     | 1.18 | -   | 4-5   | 4-6     | 45    | to 65 | $\beta$ -glucosidase                                                                                                   | 57 |
|                                    | $\beta$ -glucosidase II  | 9.4     | 0.86 | -   | 4-5   | 4-6     | 45    | to 65 | $\beta$ -glucosidase                                                                                                   | 57 |
| <i>Trichoderma reesei</i>          | BGL 2                    | 0.89    | -    | -   | 6     | 6-11    | 45    | to 45 | $\beta$ -glucosidase                                                                                                   | 48 |
|                                    | CBH I                    | 0.355   | -    | -   | 4     | 2-10    | 60    | to 50 | $\beta$ -galactosidase<br>Endoglucanase                                                                                | 23 |
|                                    | EG I                     | 9.19    | -    | -   | 4     | 2-8     | 60    | to 45 | $\beta$ -glucosidase<br>$\beta$ -glucosidase                                                                           | 23 |
|                                    | BGL I                    | 0.894   | -    | -   | 4     | 5-9     | 70    | to 55 | Endoglucanase<br>$\beta$ -glucosidase                                                                                  | 23 |
|                                    | CBH I                    | 0.00104 | -    | -   | -     | -       | -     | -     | $\beta$ -glucosidase<br>Endoglucanase                                                                                  | 58 |
|                                    | CBH I                    | 0.0103  | -    | -   | -     | -       | -     | -     | Endoglucanase                                                                                                          | 59 |



|                                  |                      |         |       |    |       |         |       |         |   |                                                                   |    |
|----------------------------------|----------------------|---------|-------|----|-------|---------|-------|---------|---|-------------------------------------------------------------------|----|
|                                  | CBH II               | 0.0064  | -     | -  | -     | -       | -     | -       | - | $\beta$ -glucosidase<br>Endoglucanase                             | 59 |
|                                  | EG I                 | 0.133   | -     | -  | -     | -       | -     | -       | - | $\beta$ -glucosidase<br>Endoglucanase                             | 60 |
|                                  | EG II                | 0.0075  | -     | -  | -     | -       | -     | -       | - | Exoglucanase<br>Endoglucanase                                     | 60 |
|                                  | CBH I                | 0.46    | -     | -  | -     | -       | -     | -       | - | Exoglucanase                                                      | 60 |
|                                  | CBH II               | 0.048   | -     | -  | -     | -       | -     | -       | - | Exoglucanase                                                      | 60 |
| <i>Trichoderma viride</i>        | Cel7A (CBH I)        | 2.5     | -     | -  | -     | -       | -     | -       | - | Exoglucanase                                                      | 25 |
|                                  | Cel6A (CBH II)       | 5.7     | -     | -  | -     | -       | -     | -       | - | Exoglucanase                                                      | 25 |
|                                  | Cel6B (CBH IIb)      | 1.1     | -     | -  | -     | -       | -     | -       | - | Exoglucanase                                                      | 25 |
| <i>Bacillus amyoliquefaciens</i> | Cellulase            | 24.6    | -     | -  | 7     | 4-9     | 50    | 40-80   |   | Endoglucanase<br>Exoglucanase<br>Xylanase<br>$\beta$ -glucosidase | 27 |
| <i>Bacillus</i> sp.              | Cel                  | 2.28    | -     | -  | -     | -       | -     | -       | - | Exoglucanase                                                      | 30 |
|                                  | E-H                  | 0.3     | -     | -  | -     | -       | -     | -       | - | Exoglucanase                                                      | 29 |
|                                  | E-L                  | 0.6     | -     | -  | -     | -       | -     | -       | - | Exoglucanase                                                      | 29 |
| <i>Cellulomonas fimi</i>         | Exg                  | 3       | 0.641 | -  | 6     | 5-9     | 60    | 60-75   |   | Exoglucanase                                                      | 61 |
| <i>Clostridium stercorarium</i>  | $\beta$ -glucosidase | 10.1    | 33    | -  | 5.5   | 5-7     | 65    | to 75   |   | $\beta$ -glucosidase<br>Exoglucanase                              | 62 |
| <i>Clostridium thermocellum</i>  | $\beta$ -glucosidase | 33.3    | -     | -  | 6-6.5 | 5.5-7.5 | 60    | to 68.5 |   | $\beta$ -glucosidase                                              | 63 |
|                                  | CelJ                 | 0.0041  | -     | -  | 6     | 5-10    | 60    | to 70   |   | Exoglucanase                                                      | 39 |
| <i>Ruminococcus flavefaciens</i> | Exo A                | 0.298   | -     | -  | 5     | 4.5-5.5 | -     | -       |   | Exoglucanase                                                      | 43 |
| <i>Thermomonospora fusca</i>     | E1                   | 0.04    | -     | -  | -     | -       | -     | -       |   | Endoglucanase                                                     | 58 |
|                                  | E5                   | 0.0148  | -     | -  | -     | -       | -     | -       |   | Endoglucanase                                                     | 58 |
|                                  | E5cd                 | 0.0144  | -     | -  | -     | -       | -     | -       |   | Endoglucanase                                                     | 58 |
|                                  | E6                   | 0.00004 | -     | -  | -     | -       | -     | -       |   | Endoglucanase                                                     | 58 |
| <i>Thermatoga maritima</i>       | Cellulase I          | 0.035   | -     | -  | 6-7.5 | -       | 95    | to 80   |   | Exoglucanase                                                      | 64 |
|                                  | Cellulase II         | 0.015   | -     | -  | 6-7.5 | -       | 95    | to 80   |   | Exoglucanase                                                      | 64 |
|                                  | CelA                 | 7.4     | -     | -  | 5     | 4-7     | 85-90 | to 95   |   | Exoglucanase                                                      | 65 |
|                                  | CelB                 | 0.05    | -     | -  | 7     | 5-9     | 85-90 | to 95   |   | Exoglucanase                                                      | 65 |
| <i>Thermatoga neapolitana</i>    | CelA                 | 69.2    | 0.97  | 69 | 6     | -       | 95    | to 95   |   | Exoglucanase                                                      | 21 |
|                                  | CelB                 | 18.4    | 0.3   | 18 | 6-6.6 | -       | 106   | to 106  |   | Exoglucanase                                                      | 21 |

**Table S4. Properties of enzymes with endoglucanase activity.** Table is organized by origin, fungal, then bacterial, then plant. All values listed are from enzymatic activities carboxymethyl cellulose (CMC), unless otherwise noted. “-“, not reported in the study. Rows of anaerobic fungi are highlighted. “\*” value calculated with CellG3 as substrate.

| Origin                             | Protein Name (Annotation) | Specific Activity (U/mg) | Kinetics Km (mg/mL)  | Kinetics Vmax (U/mg) | Optimal pH | pH Stability | Optimal Temp. (°C) | Temp. Stability (°C)     | Other Activities                                   | Ref.       |
|------------------------------------|---------------------------|--------------------------|----------------------|----------------------|------------|--------------|--------------------|--------------------------|----------------------------------------------------|------------|
| <i>Orpinomyces</i> sp. strain C1A  | EG5                       | 9.96<br>*209             | 0.00027<br>*0.000004 | 622<br>*775          | 7          | 3-8          | 50                 | 4-50                     | β-glucosidase<br>Xylanase                          | This Study |
|                                    | Cel48                     | *0.045                   | *30.1                | *0.05                | 5          | 4-9          | 39                 | 4-60                     | Exoglucanase<br>Cellobiohydrolase                  | This Study |
| <i>Aspergillus aculeatus</i>       | XEG                       | -                        | 3.6                  | 260                  | 3.4        | 3-3.8        | 30                 | to 50                    | None                                               | 66         |
| <i>Aspergillus nidulans</i>        | Endo-I                    | 9.15                     | 5                    | 15                   | 6          | -            | 65                 | -                        | None                                               | 1          |
|                                    | Endo-II                   | 8.26                     | 4                    | 12                   | 5          | -            | 50                 | -                        | None                                               | 1          |
| <i>Aspergillus niger</i>           | Cellulase                 | 194                      | -                    | -                    | 6-7        | 5-10         | 70                 | to 60                    | None                                               | 67         |
|                                    | Cellulase                 | 45.2                     | 14.5                 | 85                   | 3.8-4      | 1-9          | 45                 | to 25                    | None                                               | 68         |
|                                    | Cellulase                 | 116.8                    | 0.086                | -                    | 4          | 5-8          | 45-50              | to 70                    | None                                               | 69         |
| <i>Chaetomonium cellulolyticum</i> | Xylanase 1                | 0.06                     | -                    | -                    | 6-7        | -            | 50                 | -                        | Exoglucanase<br>Xylanase                           | 47         |
|                                    | Xylanase 2                | 0.05                     | -                    | -                    | 6-7        | -            | 50                 | -                        | Exoglucanase<br>Xylanase                           | 47         |
|                                    | Xylanase 3                | 0.03                     | -                    | -                    | 6-7        | -            | 50                 | -                        | Exoglucanase<br>Xylanase                           | 47         |
| <i>Chrysosporium lucknowense</i>   | EG25                      | 17                       | -                    | -                    | 4.5-6      | 5-8.5        | 60-70              | 60-75                    | Exoglucanase                                       | 2          |
|                                    | EG28                      | 11                       | -                    | -                    | 4.5-6      | 5-7          | 60-70              | 60-75                    | Xylanase                                           | 2          |
|                                    | EG44                      | 59                       | -                    | -                    | 4.5-6      | 5-7          | 60-70              | 60-75                    | Exoglucanase                                       | 2          |
|                                    |                           |                          |                      |                      |            |              |                    |                          | Xylanase                                           |            |
|                                    | EG47                      | 14                       | -                    | -                    | 4.5-6      | 5-8.5        | 60-70              | 60-75                    | Exoglucanase                                       | 2          |
|                                    |                           |                          |                      |                      |            |              |                    |                          | Xylanase                                           |            |
|                                    | EG51                      | 52                       | -                    | -                    | 4.5-6      | 5-7          | 60-70              | 60-75                    | Exoglucanase                                       | 2          |
|                                    |                           |                          |                      |                      |            |              |                    |                          | Xylanase                                           |            |
| EG60                               | 12                        | -                        | -                    | 4.5-6                | 5-7        | 60-70        | 60-75              | Exoglucanase             | 2                                                  |            |
| CBH I                              | 0.2                       | -                        | -                    | 4.5-6                | 5-7        | 60-70        | 60-75              | Cellobiohydrolase        | 2                                                  |            |
| CBH II                             | 1.1                       | -                        | -                    | 4.5-6                | 5-7        | 60-70        | 60-75              | Cellobiohydrolase        | 2                                                  |            |
|                                    |                           |                          |                      |                      |            |              |                    | Exoglucanase<br>Xylanase |                                                    |            |
| <i>Cryptococcus</i> sp. S-2        | CSCMCase                  | 248.7                    | -                    | -                    | 3.5        | 5.5-7.5      | 40-50              | to 90                    | None                                               | 70         |
| <i>Fusarium oxysporum</i>          | Xylanase                  | 5                        | 13.1                 | -                    | 7.4        | 5.8-8.2      | 50                 | to 50                    | Xylanase                                           | 3          |
|                                    |                           |                          |                      |                      |            |              |                    |                          | Exoglucanase                                       |            |
| <i>Fusarium solani</i>             | Cellulase                 | 4.75                     | -                    | -                    | 5          | 5-7          | 65                 | to 65                    | β-glucosidase<br>Cellobiohydrolase<br>Exoglucanase | 4          |

|                                   |                   |        |     |     |         |          |       |       |                                                                       |    |
|-----------------------------------|-------------------|--------|-----|-----|---------|----------|-------|-------|-----------------------------------------------------------------------|----|
| <i>Gloeophyllum trabeum</i>       | Cel5A             | 120    | -   | -   | -       | -        | -     | -     | Xylanase<br>Exoglucanase                                              | 5  |
|                                   | Xyn10A            | 0.95   | -   | -   | -       | -        | -     | -     | Xylanase<br>Exoglucanase                                              | 5  |
|                                   | Cel12A            | 42     | -   | -   | -       | -        | -     | -     | Xylanase<br>Exoglucanase                                              | 5  |
| <i>Humicola grisea</i>            | Endoglucanase 1   | 9.06   | -   | -   | 6-7     | 4-12     | 40-60 | 30-65 | None                                                                  | 6  |
|                                   | Endoglucanase 2   | 24.1   | -   | -   | 5-6     | 6-10     | 55    | 30-55 | None                                                                  | 6  |
| <i>Neocallimastix patricianum</i> | CelA              | 108    | -   | -   | 6       | 5.2-11.3 | 50    | to 70 | Exoglucanase                                                          | 7  |
|                                   | CelA              | 15.1   | -   | -   | -       | -        | -     | -     | Exoglucanase                                                          | 8  |
|                                   | CelB              | 53.6   | -   | -   | -       | -        | -     | -     | Exoglucanase<br>Cellobiohydrolase                                     | 8  |
|                                   | CelC              | 20.6   | -   | -   | -       | -        | -     | -     | Exoglucanase                                                          | 8  |
|                                   | CelD              | 4.9    | -   | -   | -       | -        | -     | -     | Exoglucanase<br>Cellobiohydrolase                                     | 9  |
| <i>Orpinomyces jayonii</i>        | Cellulase         | 203    | 0.5 | -   | 5.5     | 5-7.5    | 40    | to 50 | Exoglucanase<br>Cellobiohydrolase<br>Xylanase                         | 49 |
|                                   | CelB2             | 203    | -   | -   | 5.5     | 5-7.5    | 40    | to 50 | Cellobiohydrolase                                                     | 49 |
|                                   | CelA              | 13.2   | -   | -   | 4       | 3-7      | 40    | to 50 | Exoglucanase                                                          | 10 |
| <i>Orpinomyces</i> sp. PC-2       | CelE              | 3.2    | -   | -   | -       | -        | -     | -     | Cellobiohydrolase                                                     | 50 |
|                                   | CelB              | 2.9    | -   | -   | -       | -        | -     | -     | None                                                                  | 50 |
|                                   | CelE              | 72.5   | -   | -   | 6       | 5.5-7.5  | 45    | 40-55 | None                                                                  | 71 |
|                                   | CelA              | 1.2    | -   | -   | 4.8     | 4.3-6.8  | 50    | to 40 | Exoglucanase                                                          | 11 |
|                                   | CelC              | 1.1    | -   | -   | 5.6-6.2 | 4.6-7    | 40    | to 40 | Exoglucanase                                                          | 11 |
| <i>Orpinomyces</i> sp. Y102       | CelC7             | 25.96  | -   | -   | 6.5     | 4-11     | 40    | 30-50 | Exoglucanase                                                          | 12 |
| <i>Penicillium brasilianum</i>    | EGa               | 39.8   | -   | -   | -       | -        | -     | -     | Exoglucanase                                                          | 13 |
|                                   | EGb1              | 54     | -   | -   | -       | -        | -     | -     | Exoglucanase                                                          | 13 |
|                                   | EGb2              | 36.3   | -   | -   | -       | -        | -     | -     | Exoglucanase                                                          | 13 |
| <i>Penicillium funiculosum</i>    | Cellobiohydrolase | 0.05   | -   | -   | 4-5.5   | 2.5-5.5  | 60    | to 70 | Cellobiohydrolase                                                     | 52 |
| <i>Piromyces equi</i>             | Cel5A             | 3.2    | -   | -   | 5.1     | 5.1-6.4  | 45    | to 50 | Cellobiohydrolase                                                     | 54 |
|                                   | Cel45A            | 42.5   | -   | -   | 6.5     | 5.2-7.9  | 60    | to 65 | None                                                                  | 54 |
| <i>Piromyces rhizinflatus</i>     | CbhYW23-2         | 6.0    | -   | -   | 6       | -        | 46.4  | to 50 | Endoglucanase                                                         | 16 |
| <i>Termitomyces</i> sp.           | Cellulase IF      | 378    | -   | -   | 4.4     | 2.8-5.5  | 55    | to 42 | Exoglucanase                                                          | 18 |
| <i>Thermoascus aurantiacus</i>    | Cellulase I       | 0.525  | 3.9 | 6.3 | 5       | 6-8      | 75    | to 65 | None                                                                  | 72 |
|                                   | Cellulase II      | 0.0031 | 1.2 | 1.1 | 5       | 2-12     | 60    | to 65 | None                                                                  | 72 |
|                                   | Cellulase III     | 0.24   | 1.9 | 33  | 5       | 6-8      | 65    | to 65 | None                                                                  | 72 |
| <i>Trichoderma harzianum</i>      | Endoglucanase     | 312.5  | -   | -   | 5-5.5   | -        | 40    | to 35 | None                                                                  | 20 |
|                                   | EG                | 0.63   | -   | -   | 5.5     | -        | -     | -     | None                                                                  | 19 |
| <i>Trichoderma reesei</i>         | CBHI              | 0.0021 | -   | -   | -       | -        | -     | -     | Cellobiohydrolase<br>Exoglucanase<br>$\beta$ -glucosidase<br>Xylanase | 58 |

|                                  |                |        |      |      |       |       |       |       |   |                                                                         |    |
|----------------------------------|----------------|--------|------|------|-------|-------|-------|-------|---|-------------------------------------------------------------------------|----|
|                                  | CBHII          | 0.0014 | -    | -    | -     | -     | -     | -     | - | Cellobiohydrolase<br>Exoglucanase<br>$\beta$ -glucosidase<br>Xylanase   | 58 |
|                                  | CBHI           | 0.2    | -    | -    | -     | -     | -     | -     | - | Cellobiohydrolase<br>Exoglucanase<br>$\beta$ -glucosidase<br>Xylanase   | 59 |
|                                  | CBHII          | 21.5   | -    | -    | -     | -     | -     | -     | - | Cellobiohydrolase<br>Exoglucanase<br>$\beta$ -glucosidase<br>Xylanase   | 59 |
|                                  | EG I           | 59.8   | -    | -    | 4     | 2-8   | 60    | to 45 |   | Xylanase<br>Exoglucanase<br>$\beta$ -glucosidase<br>$\beta$ -xylosidase | 23 |
|                                  | EG III         | 30.7   | -    | -    | 4     | 2-6   | 70    | to 55 |   | None                                                                    | 23 |
|                                  | EG V           | 9.22   | -    | -    | 4     | 2-6   | 50-65 | to 80 |   | None                                                                    | 23 |
| <i>Trichoderma viride</i>        | Cel7B (EG I)   | 7.6    | -    | -    | -     | -     | -     | -     | - | Exoglucanase<br>Cellobiohydrolase                                       | 25 |
|                                  | Cel2A (EG III) | 2.8    | -    | -    | -     | -     | -     | -     | - | Exoglucanase<br>Cellobiohydrolase                                       | 25 |
|                                  | Cel61A (EG IV) | 1.9    | -    | -    | -     | -     | -     | -     | - | Exoglucanase<br>Cellobiohydrolase                                       | 25 |
|                                  | Cel6A (CBH II) | 0.1    | -    | -    | -     | -     | -     | -     | - | Exoglucanase<br>Cellobiohydrolase                                       | 25 |
|                                  | CMCase         | 0.258  | 0.88 | 3.5  | 4     | 3-7   | 50    | 30-70 |   | None                                                                    | 73 |
|                                  | Cellulase      | 105    | 68   | 148  | 6.5   | 6.5-8 | 55    | 45-55 |   | None                                                                    | 74 |
| <i>Anaerocellum thermophilum</i> | CelA           | 1.758  | -    | -    | 5-6   | -     | 85-95 | -     | - | Exoglucanase<br>Xylanase                                                | 26 |
| <i>Bacillus</i> sp.              | CH43           | 0.0062 | 1.5  | 0.93 | 5-6.5 | 6-10  | 65    | to 50 |   | Exoglucanase                                                            | 28 |
|                                  | HR68           | 0.0159 | 1.7  | 1.7  | 5-6.5 | 6-8   | 70    | to 50 |   | Exoglucanase                                                            | 28 |
|                                  | Cellulase      | 58.9   | 0.48 | -    | 9     | 6-12  | 40    | to 60 |   | None                                                                    | 75 |
|                                  | Cellulase      | 49.4   | 11.4 | 135  | 8.6-9 | 5-11  | 45    | to 60 |   | $\beta$ -glucosidase<br>Cellobiohydrolase<br>Exoglucanase<br>Xylanase   | 76 |
|                                  | E-H            | 23.5   | -    | -    | -     | -     | -     | -     | - | Exoglucanase<br>Cellobiohydrolase                                       | 29 |
|                                  | E-L            | 43.8   | -    | -    | -     | -     | -     | -     | - | Exoglucanase<br>Cellobiohydrolase                                       | 29 |
|                                  | Cellulase      | 71     | -    | -    | 10    | 6-10  | 50    | to 60 |   | None                                                                    | 77 |
|                                  | Cel            | 128    | -    | -    | -     | -     | -     | -     | - | Cellobiohydrolase                                                       | 30 |
|                                  | E-I            | 0.12   | -    | -    | 6     | 5-8   | 60    | to 80 |   | None                                                                    | 78 |

|                                    |               |         |      |      |       |         |       |       |                                                           |       |
|------------------------------------|---------------|---------|------|------|-------|---------|-------|-------|-----------------------------------------------------------|-------|
|                                    | E-II          | 60      | -    | -    | 7     | 7-10    | 50    | to 60 | None                                                      | 78    |
|                                    | E-III         | 59      | -    | -    | 7     | 6-10    | 50    | to 60 | None                                                      | 78    |
|                                    | Cellulase     | 246     | -    | -    | 6     | 5-7     | 50    | to 50 | None                                                      | 79    |
| <i>Bacillus amyoliquefaciens</i>   | Cellulase     | 100     | -    | -    | 7     | 4-9     | 50    | 40-80 | Exoglucanase<br>Cellobiohydrolase                         | 27    |
| <i>Bacillus pumilus</i>            | Cellulase     | 0.079   | -    | -    | 6     | 5-9     | 60    | 30-70 | Exoglucanase<br>$\beta$ -glucosidase                      | 80    |
| <i>Bacillus sphaericus</i>         | Cellulase     | 38.4    | -    | -    | 8     | 7-10.5  | 60    | to 70 | $\beta$ -glucosidase                                      | 31    |
| <i>Bacillus subtilis</i>           | CelDR         | 0.3     | -    | -    | 6.5   | -       | 50    | to 75 | None                                                      | 81    |
|                                    | Cellulase     | 7001    | -    | -    | 6     | 6-7     | 50-60 | to 50 | Exoglucanase                                              | 32    |
| <i>Caldibacillus cellulovorans</i> | CMCase        | 30.6    | 3.4  | 44.7 | 6.5-7 | -       | 80    | to 70 | None                                                      | 33    |
| <i>Cellulomonas fimi</i>           | Cex           | 0.01    | -    | -    | -     | 6-9     | -     | -     | Exoglucanase                                              | 34-36 |
|                                    | CenA          | 0.760   | -    | -    | -     | -       | -     | -     | $\beta$ -glucosidase<br>Cellobiohydrolase                 | 36    |
|                                    | CenB          | 0.928   | -    | -    | -     | -       | -     | -     | Exoglucanase<br>$\beta$ -glucosidase<br>Cellobiohydrolase | 36    |
|                                    | CenC          | 1.016   | -    | -    | -     | -       | -     | -     | Exoglucanase                                              | 36    |
|                                    | CenD          | 0.01    | -    | -    | -     | -       | -     | -     | Exoglucanase                                              | 36    |
|                                    | Exg           | 20      | 3.18 | -    | 6     | 5-9     | -     | 60-75 | Exoglucanase<br>Cellobiohydrolase                         | 61    |
| <i>Cellulomonas sp.</i>            | Cellulase I   | 162     | -    | -    | -     | -       | -     | -     | None                                                      | 82    |
|                                    | Cellulase CA  | 136     | -    | -    | -     | -       | -     | -     | None                                                      | 82    |
|                                    | Cellulase CB  | 9.7     | -    | -    | -     | -       | -     | -     | None                                                      | 82    |
| <i>Clostridium cellulolyticum</i>  | CelF          | 0.0014  | -    | -    | 5.5-6 | -       | 55    | 20-45 | Exoglucanase                                              | 37    |
| <i>Clostridium thermocellum</i>    | CelJ          | 13.1    | 4.06 | 164  | 6     | 5-10    | 60    | to 70 | Exoglucanase<br>Cellobiohydrolase                         | 39    |
|                                    | Endoglucanase | 65.1    | -    | -    | 5.2   | 4.5-7   | 62    | to 70 | Exoglucanase                                              | 41    |
| <i>Marinobacter sp.</i>            | CMCase        | 2548.75 | -    | -    | 9     | 4-12    | 27-35 | -     | None                                                      | 83    |
| <i>Salinivibrio sp.</i>            | Cellulase     | 32.4    | 3.03 | 143  | 7.5   | 6.5-8.5 | 35    | 10-40 | None                                                      | 84    |
| <i>Sinorhizobium fredii</i>        | CMCase        | 3.822   | -    | -    | 7     | 6-9     | 35    | 30-45 | None                                                      | 85    |
| <i>Thermomonospora curvata</i>     | Cellulase     | 0.3     | 3.5  | 213  | 6     | 5-8     | 65    | to 65 | None                                                      | 86    |
| <i>Thermomonospora fusca</i>       | E1            | 5.41    | -    | -    | -     | -       | -     | -     | None                                                      | 58    |
|                                    | E2            | 0.369   | -    | -    | -     | -       | -     | -     | None                                                      | 58    |
|                                    | E2cd          | 0.344   | -    | -    | -     | -       | -     | -     | None                                                      | 58    |
|                                    | E3            | 0.0013  | -    | -    | -     | -       | -     | -     | None                                                      | 58    |
|                                    | E4            | 0.122   | -    | -    | -     | -       | -     | -     | None                                                      | 58    |
|                                    | E5            | 2.840   | -    | -    | -     | -       | -     | -     | None                                                      | 58    |
|                                    | E5cd          | 2.480   | -    | -    | -     | -       | -     | -     | None                                                      | 58    |
|                                    | E6            | 0.0642  | -    | -    | -     | -       | -     | -     | None                                                      | 58    |
| <i>Thermatoga maritima</i>         | Cellulase I   | 1.2     | -    | -    | 6-7.5 | -       | 95    | to 80 | Exoglucanase<br>Cellobiohydrolase                         | 64    |

|                               |               |      |      |      |         |         |       |        |                      |    |
|-------------------------------|---------------|------|------|------|---------|---------|-------|--------|----------------------|----|
|                               | Cellulase II  | 1.5  | -    | -    | 6-7.5   | -       | 95    | to 80  | Exoglucanase         | 64 |
|                               | CelA          | 302  | -    | -    | 5       | 4-7     | 85-90 | to 95  | Cellobiohydrolase    | 65 |
|                               | CelB          | 0.89 | -    | -    | 7       | 5-9     | 95    | to 95  | Exoglucanase         | 65 |
|                               |               |      |      |      |         |         |       |        | Cellobiohydrolase    |    |
| <i>Thermatoga neapolitana</i> | CelA          | 1219 | 0.25 | 1219 | 6       | -       | 95    | to 95  | $\beta$ -glucosidase | 21 |
|                               | CelB          | 1536 | 0.22 | 1536 | 6-6.6   | -       | 106   | to 106 | Cellobiohydrolase    | 21 |
|                               |               |      |      |      |         |         |       |        | $\beta$ -glucosidase |    |
|                               |               |      |      |      |         |         |       |        | Cellobiohydrolase    |    |
| <i>Ergates faber</i>          | Cellulase A   | 30   | 20   | -    | 4-4.7   | -       | 37    | to 55  | None                 | 87 |
|                               | Cellulase B   | 56   | 28   | -    | 5.2     | -       | 37    | to 45  | None                 | 87 |
|                               | Cellulase C   | 157  | 6    | -    | 5.2     | -       | 37    | to 60  | None                 | 87 |
| <i>Macrotermes mulleri</i>    | Cellulase IT  | 360  | -    | -    | 4.4     | 2.8-5.5 | 55    | to 42  | Exoglucanase         | 18 |
|                               | Cellulase II  | 274  | -    | -    | 4.3-4.5 | 2.8-5.5 | 37    | to 42  | Exoglucanase         | 18 |
| <i>Panesthia cribrata</i>     | EG1           | 22.2 | 9.4  | 1850 | -       | -       | -     | -      | None                 | 88 |
|                               | EG2           | 88.3 | 6.8  | 3440 | -       | -       | -     | -      | None                 | 88 |
| <i>Panesthia hilaris</i>      | Cellulase     | 150  | -    | -    | 5.5     | 4-7     | -     | -      | None                 | 89 |
| <i>Phaseolus vulgaris</i>     | Cellulase 4.5 | 17   | -    | -    | 5.7-6.2 | 6-9     | 35-43 | to 30  | None                 | 90 |
|                               | Cellulase 4.8 | 814  | -    | -    | 4.8-5.6 | 6.5-8   | 45-60 | to 36  | None                 | 90 |

**Table S5. Properties of enzymes with  $\beta$ -glucosidase activity.** Table is organized by origin, fungal, then bacterial, then plant. All values listed are from enzymatic activities against *p*-nitrophenyl- $\beta$ -D-glucopyranoside, PNPG. “-”, not reported in the study. Rows of anaerobic fungi are highlighted.

| Origin                            | Protein Name (Annotation) | Specific Activity (U/mg) | Kinetics Km (mM) | Kinetics Vmax (U/mg) | Optimal pH | pH Stability | Optimal Temp. (°C) | Temp. Stability (°C) | Other Activities                                                   | Ref.                     |
|-----------------------------------|---------------------------|--------------------------|------------------|----------------------|------------|--------------|--------------------|----------------------|--------------------------------------------------------------------|--------------------------|
| <i>Orpinomyces</i> sp. strain C1A | BGL1                      | 1.063                    | 0.164            | 5.4                  | 7          | 5-9          | 39                 | 4-50                 | None                                                               | This Study               |
|                                   | BGL3                      | 0.8                      | 0.275            | 1.6                  | 6          | 6-8          | 39                 | 4-39                 | $\beta$ -xylosidase                                                | This study               |
|                                   | EG5                       | 0.29                     | 84               | 0.45                 | 7          | 3-8          | 50                 | 4-50                 | Endoglucanase                                                      | This Study               |
|                                   | XYL11                     | 0.22                     | 0.216            | 0.28                 | 5          | 3-9          | 50                 | 4-60                 | Xylanase                                                           | This Study <sup>91</sup> |
|                                   | Bgxl                      | 73.4                     | 0.000013         | 769                  | 6          | 4-12         | 39                 | 4-70                 | $\beta$ -xylosidase<br>$\beta$ -galactosidase<br>Xylanase          |                          |
| <i>Acremonium persicinum</i>      | $\beta$ -glucosidase      | 0.0183                   | 0.3              | -                    | 5.5        | -            | -                  | -                    | Cellobiohydrolase                                                  | 45                       |
| <i>Aspergillus fumigatus</i>      | $\beta$ -xylosidase       | 0.76                     | -                | -                    | 4.5        | 2-8          | 75                 | to 65                | $\beta$ -xylosidase                                                | 92                       |
|                                   | $\beta$ -Glucosidase      | 1.03                     | -                | -                    | 4.5        | 2-8          | 65                 | to 60                | $\beta$ -xylosidase                                                | 92                       |
| <i>Aspergillus nidulans</i>       | B-Gluco-I                 | 4.52                     | 0.24             | 8                    | 5          | -            | 65                 | -                    | None                                                               | 1                        |
|                                   | B-Gluco-II                | 0.55                     | 0.12             | 0.7                  | 6          | -            | 35                 | -                    | None                                                               | 1                        |
| <i>Aspergillus niger</i>          | $\beta$ -xylosidase       | 0.15                     | -                | -                    | 6.7-7      | -            | 42                 | to 46                | $\beta$ -xylosidase                                                | 93                       |
|                                   | $\beta$ -xylosidase 1     | 0.2                      | -                | -                    | -          | -            | -                  | -                    | $\beta$ -xylosidase                                                | 94                       |
|                                   | $\beta$ -xylosidase 2     | 0.3                      | -                | -                    | -          | -            | -                  | -                    | Arabinosidase<br>$\beta$ -xylosidase<br>Arabinosidase              | 94                       |
| <i>Aureobasidium</i> sp.          | $\beta$ -xylosidase       | 15.6                     | -                | -                    | 3.5        | 3.5-9        | 80                 | to 80                | $\beta$ -xylosidase                                                | 95                       |
| <i>Candida peltata</i>            | $\beta$ -glucosidase      | 108                      | 2.3              | 221                  | 5          | 3.5-6        | 50                 | 25-45                | Cellobiohydrolase                                                  | 46                       |
| <i>Chrysosporium lucknowense</i>  | EG60                      | 0.12                     | -                | -                    | 4.5-6      | 5-7          | 60-70              | 60-75                | Endoglucanase                                                      | 2                        |
|                                   | CBH1                      | 0.02                     | -                | -                    | 4.5-6      | 5-7          | 60-70              | 60-75                | Cellobiohydrolase                                                  | 2                        |
| <i>Fusarium oxysporum</i>         | Xylanase                  | 0.9                      | -                | -                    | 7.4        | 5.8-8.2      | 50                 | to 50                | Xylanase<br>Endoglucanase<br>Exoglucanase                          | 3                        |
| <i>Fusarium solani</i>            | Cellulase                 | 4.65                     | -                | -                    | 5          | 5.7          | 65                 | to 65                | Cellobiohydrolase<br>Endoglucanase<br>Exoglucanase                 | 4                        |
| <i>Humicola grisea</i>            | Exoglucanase 1            | 1.14                     | -                | -                    | 6-8        | 4-14         | 55-70              | 30-75                | Cellobiohydrolase<br>Endoglucanase<br>Exoglucanase                 | 6                        |
|                                   | $\beta$ -glucosidase 1    | 85.7                     | 0.16             | 64                   | 4.5        | 4-12         | 60-65              | 30-60                | Cellobiohydrolase<br>$\beta$ -galactosidase<br>$\beta$ -xylosidase | 6                        |
|                                   | $\beta$ -glucosidase 2    | 12.5                     | 0.25             | 21                   | 6-8        | 4-12         | 60-65              | 30-50                | Cellobiohydrolase<br>$\beta$ -galactosidase<br>$\beta$ -xylosidase | 6                        |

|                                    |                          |       |       |      |         |         |       |       |                                                                    |     |
|------------------------------------|--------------------------|-------|-------|------|---------|---------|-------|-------|--------------------------------------------------------------------|-----|
|                                    | $\beta$ -glucosidase 3   | 12.6  | 0.22  | 23   | 6-8     | 4-12    | 60-65 | 30-50 | Cellobiohydrolase<br>$\beta$ -galactosidase<br>$\beta$ -xylosidase | 6   |
|                                    | $\beta$ -glucosidase 4   | 8.34  | 0.34  | 8.7  | 6-7     | 4-12    | 50-55 | 30-50 | Cellobiohydrolase<br>$\beta$ -galactosidase<br>$\beta$ -xylosidase | 6   |
|                                    | $\beta$ -glucosidase 5   | 17.9  | 0.56  | 18   | 6       | 4-12    | 60    | 30-55 | Cellobiohydrolase<br>$\beta$ -galactosidase<br>$\beta$ -xylosidase | 6   |
|                                    | $\beta$ -glucosidase 6   | 33.4  | 0.12  | 40   | 6-7     | 4-12    | 65-70 | 30-65 | Cellobiohydrolase<br>$\beta$ -galactosidase<br>$\beta$ -xylosidase | 6   |
|                                    | BGL I                    | 26.1  | 0.34  | 25   | 6       | 6-11    | 55    | to 50 | Cellobiohydrolase<br>$\beta$ -galactosidase                        | 48  |
| <i>Neocallimastix frontalis</i>    | $\beta$ -xylosidase      | 0.2   | 2.98  | 0.27 | 6.4     | -       | 37    | to 40 | $\beta$ -xylosidase                                                | 96  |
|                                    | $\beta$ -glucosidase     | 9.0   | 0.031 | -    | -       | -       | -     | -     | Arabinosidase<br>$\beta$ -galactosidase                            | 97  |
|                                    | $\beta$ -glucosidase     | 15    | 0.55  | -    | 6       | 5-8     | 50    | to 40 | Cellobiohydrolase<br>None                                          | 98  |
| <i>Orpinomyces</i> sp. strain PC-2 | $\beta$ -glucosidase     | 33.5  | 0.39  | 47.5 | 6.2     | 5-8     | 50    | to 65 | Cellobiohydrolase                                                  | 99  |
| <i>Paecilomyces thermophila</i>    | $\beta$ -glucosidase     | 97.2  | 0.27  | 780  | 6.2     | 5-8.5   | 75    | 65-70 | Exoglucanase                                                       | 51  |
| <i>Penicillium funiculosum</i>     | Cellulase                | -     | 0.77  | -    | 5       | -       | 50    | to 60 | Cellobiohydrolase<br>Exoglucanase                                  | 14  |
| <i>Phanerochaete chrysosporium</i> | $\beta$ -glucosidase     | -     | 0.096 | -    | 4-5.2   | 4-8     | 25    | to 45 | None                                                               | 53  |
| <i>Pichia pastoris</i> X-33        | EXG1                     | 37.5  | -     | -    | -       | -       | -     | -     | $\beta$ -xylosidase<br>Exoglucanase                                | 15  |
| <i>Piromyces communis</i>          | $\beta$ -glucosidase     | 20    | 0.52  | -    | 6       | 5-8     | 50    | to 40 | None                                                               | 98  |
| <i>Piromyces</i> sp. E2            | $\beta$ -glucosidase     | 0.25  | 1.0   | 66.5 | 5.7-6.3 | -       | 47    | to 37 | Cellobiohydrolase                                                  | 100 |
| <i>Sphaeromonas communis</i>       | $\beta$ -glucosidase     | 46    | 0.51  | -    | 6       | 5-8     | 50    | to 40 | None                                                               | 98  |
| <i>Sporotrichum thermophila</i>    | $\beta$ -glucosidase I   | 89    | 0.29  | -    | 5.4     | 4-6.5   | 65    | to 65 | None                                                               | 55  |
|                                    | $\beta$ -glucosidase A   | 0.595 | 0.5   | -    | 5.6     | -       | 50    | to 40 | None                                                               | 101 |
|                                    | $\beta$ -glucosidase B   | 1.295 | 0.18  | -    | 6.3     | -       | 50    | to 40 | None                                                               | 101 |
| <i>Stachybotrys</i> sp.            | $\beta$ -glucosidase p21 | 0.33  | 0.27  | 78   | 5       | 5-7     | 50    | to 60 | None                                                               | 56  |
| <i>Thermoascus aurantiacus</i>     | $\beta$ -glucosidase     | 232   | 0.52  | 6500 | 5       | 6-8     | 70    | to 75 | None                                                               | 72  |
|                                    | $\beta$ -glucosidase     | 0.3   | 0.11  | -    | 4.5     | 4.4-5.2 | 80    | 70-90 | Cellobiohydrolase                                                  | 102 |
| <i>Trichoderma harzianum</i>       | BGL                      | 0.35  | -     | -    | -       | -       | 28    | -     | None                                                               | 19  |
|                                    | $\beta$ -xylosidase      | 0.28  | -     | -    | 4-4.5   | -       | 60    | -     | $\beta$ -xylosidase<br>$\beta$ -galactosidase<br>Arabinosidase     | 103 |
| <i>Trichoderma koningii</i>        | $\beta$ -glucosidase     | 16    | 0.37  | -    | 4-5     | 4-6     | 45    | to 65 | Cellobiohydrolase                                                  | 57  |
|                                    | $\beta$ -glucosidase II  | 14    | 0.85  | -    | 4-5     | 4-6     | 45    | to 65 | Cellobiohydrolase                                                  | 57  |
| <i>Trichoderma reesei</i>          | BGL2                     | 23.9  | 2.22  | 40   | 6       | 6-11    | 45    | to 45 | Cellobiohydrolase<br>$\beta$ -galactosidase                        | 48  |



|                                   |                      |          |      |   |       |         |     |         |                     |    |
|-----------------------------------|----------------------|----------|------|---|-------|---------|-----|---------|---------------------|----|
|                                   | BGLI                 | 767.7    | -    | - | 4     | 5-9     | 70  | to 55   | Cellobiohydrlase    | 23 |
|                                   | CBH I                | 5.5      | -    | - | -     | -       | -   | -       | Cellobiohydrolase   | 59 |
|                                   |                      |          |      |   |       |         |     |         | Endoglucanase       |    |
|                                   | CBH II               | 33       | -    | - | -     | -       | -   | -       | Cellobiohydrolase   | 59 |
|                                   |                      |          |      |   |       |         |     |         | Endoglucanase       |    |
|                                   | CBH III              | 0.00001  | -    | - | -     | -       | -   | -       | Cellobiohydrolase   | 22 |
|                                   |                      |          |      |   |       |         |     |         | Xylanase            |    |
|                                   |                      |          |      |   |       |         |     |         | Mannanase           |    |
|                                   |                      |          |      |   |       |         |     |         | $\beta$ -xylosidase |    |
|                                   |                      |          |      |   |       |         |     |         | Exoglucanase        |    |
|                                   | EG I                 | 0.00005  | -    | - | -     | -       | -   | -       | Cellobiohydrolase   | 22 |
|                                   |                      |          |      |   |       |         |     |         | Xylanase            |    |
|                                   |                      |          |      |   |       |         |     |         | Mannanase           |    |
|                                   |                      |          |      |   |       |         |     |         | $\beta$ -xylosidase |    |
|                                   |                      |          |      |   |       |         |     |         | Exoglucanase        |    |
|                                   | XYL 9                | 0.00001  | -    | - | -     | -       | -   | -       | Xylanase            | 22 |
|                                   |                      |          |      |   |       |         |     |         | Mannanase           |    |
|                                   |                      |          |      |   |       |         |     |         | $\beta$ -xylosidase |    |
|                                   | XYL 5.5              | 0.000001 | -    | - | -     | -       | -   | -       | Xylanase            | 22 |
|                                   |                      |          |      |   |       |         |     |         | Mannanase           |    |
|                                   |                      |          |      |   |       |         |     |         | $\beta$ -xylosidase |    |
| <i>Trichoderma viride</i> T100-14 | $\beta$ -glucosidase | 5.6      | -    | - | -     | -       | -   | -       | Cellobiohydrolase   | 25 |
| <i>Bacillus</i> sp. KSM-S237      | Cellulase            | 5.4      | -    | - | 8.6-9 | 5-11    | 45  | to 60   | Endoglucanase       | 76 |
|                                   |                      |          |      |   |       |         |     |         | Cellobiohydrolase   |    |
|                                   |                      |          |      |   |       |         |     |         | Exoglucanase        |    |
|                                   |                      |          |      |   |       |         |     |         | Xylanase            |    |
| <i>Bacillus pumilus</i> EB3       | Cellulase            | 0.038    | -    | - | 6     | 5-9     | 60  | 30-70   | Exoglucanase        | 80 |
|                                   |                      |          |      |   |       |         |     |         | Endoglucanase       |    |
| <i>Bacillus sphaericus</i> JS1    | Cellulase            | 3.07     | -    | - | 8     | 7-10.5  | 60  | to 70   | Endoglucanase       | 31 |
| <i>Cellulomonas fimi</i>          | CenA                 | 1.6      | -    | - | -     | -       | -   | -       | Exoglucanase        | 36 |
|                                   |                      |          |      |   |       |         |     |         | Endoglucanase       |    |
|                                   |                      |          |      |   |       |         |     |         | Cellobiohydrolase   |    |
|                                   | Exg                  | 0.9      | -    | - | 6     | 5-9     | -   | 60-75   | Xylanase            | 61 |
|                                   |                      |          |      |   |       |         |     |         | Endoglucanase       |    |
|                                   |                      |          |      |   |       |         |     |         | Exoglucanase        |    |
|                                   |                      |          |      |   |       |         |     |         | Cellobiohydrolase   |    |
| <i>Clostridium stercorarium</i>   | $\beta$ -glucosidase | 31.6     | 0.8  | - | 5.5   | 5-7     | 65  | to 75   | Cellobiohydrolase   | 62 |
| <i>Clostridium thermocellum</i>   | $\beta$ -glucosidase | 127      | -    | - | 6-6.5 | 5.5-7.5 | 60  | to 68.5 | Cellobiohydrolase   | 63 |
| <i>Thermotoga neapolitana</i>     | CelA                 | 0.01     | -    | - | 6     | -       | 95  | to 95   | Endoglucanase       | 21 |
|                                   |                      |          |      |   |       |         |     |         | Cellobiohydrolase   |    |
|                                   | CelB                 | 0.18     | -    | - | 6-6.6 | -       | 106 | to 106  | Endoglucanase       | 21 |
|                                   |                      |          |      |   |       |         |     |         | Cellobiohydrolase   |    |
| <i>Panesthia cribrata</i>         | GD1                  | 9        | 10.6 | - | -     | -       | -   | -       | Endoglucanase       | 88 |
|                                   | GD2                  | 3        | 13.8 | - | -     | -       | -   | -       | Endoglucanase       | 88 |

**Table S6. Properties of enzymes with  $\beta$ -xylosidase activity.** Table is organized by origin, fungal, then bacterial, then plant. All values listed are from enzymatic activities against *p*-nitrophenyl- $\beta$ -D-xylopyranoside, PNPX. “-”, not reported in the study. Rows of anaerobic fungi are highlighted.

| Origin                             | Protein Name (Annotation) | Specific Activity (U/mg) | Kinetics Km (mM) | Kinetics Vmax (U/mg) | Optimal pH | pH Stability | Optimal Temp. (°C) | Temp. Stability (°C) | Other Activities                                                    | Ref.             |
|------------------------------------|---------------------------|--------------------------|------------------|----------------------|------------|--------------|--------------------|----------------------|---------------------------------------------------------------------|------------------|
| <i>Orpinomyces</i> sp. strain C1A  | BGL3                      | 0.06                     | 50.6             | 0.068                | 6          | 6-8          | 39                 | 4-39                 | $\beta$ -xylosidase                                                 | This study<br>91 |
|                                    | Bgxgl                     | 11.5                     | 0.00485          | 127                  | 6          | 4-12         | 39                 | 4-70                 | $\beta$ -glucosidase<br>$\beta$ -galactosidase<br>Xylanase          |                  |
| <i>Acromonium persicinum</i>       | $\beta$ -glucosidase      | 0.002                    | -                | -                    | 5.5        | -            | -                  | -                    | $\beta$ -glucosidase                                                | 45               |
| <i>Aspergillus awamori</i>         | $\beta$ -xylosidase       | 34.1                     | 0.003            | 476                  | 6.5        | -            | 70                 | to 70                | Xylanase                                                            | 104              |
| <i>Aspergillus carbonarius</i>     | $\beta$ -xylosidase       | 3.29                     | 0.198            | 3.64                 | 4          | 3.5-6.5      | 60                 | to 50                | Arabinosidase                                                       | 105              |
| <i>Aspergillus fumigatus</i>       | $\beta$ -xylosidase       | 27.5                     | 2                | -                    | 4.5        | 2-8          | 75                 | to 65                | $\beta$ -glucosidase                                                | 92               |
|                                    | $\beta$ -Glucosidase      | 1.03                     | -                | -                    | 4.5        | 2-8          | 65                 | to 60                | $\beta$ -glucosidase                                                | 92               |
| <i>Aspergillus nidulans</i>        | $\beta$ -xylosidase       | 1.2                      | 1.1              | 25.6                 | 5          | 4-6          | 50                 | to 45                | None                                                                | 106              |
| <i>Aspergillus niger</i>           | $\beta$ -xylosidase       | 5.2                      | 0.22             | -                    | 6.7-7      | -            | 42                 | to 46                | $\beta$ -glucosidase                                                | 93               |
|                                    | $\beta$ -xylosidase 1     | 60.2                     | -                | -                    | -          | -            | -                  | -                    | $\beta$ -glucosidase<br>Arabinosidase                               | 94               |
|                                    | $\beta$ -xylosidase 2     | 60.9                     | -                | -                    | -          | -            | -                  | -                    | $\beta$ -glucosidase<br>Arabinosidase                               | 94               |
| <i>Aspergillus phoenicis</i>       | $\beta$ -xylosidase       | 821                      | 2.36             | -                    | 4-4.5      | 4-6          | 75                 | to 60                | None                                                                | 107              |
| <i>Aspergillus pulverulentus</i>   | $\beta$ -xyII             | 32                       | -                | -                    | 2.5-3.5    | 1.5-6.5      | 60                 | to 50                | None                                                                | 108              |
|                                    | $\beta$ -xyIII            | 12                       | -                | -                    | 4-5        | 1.5-6.5      | 60                 | to 50                | None                                                                | 108              |
| <i>Aureobasidium</i> sp.           | $\beta$ -xylosidase       | 626                      | 2                | 940                  | 3.5        | 3.5-9        | 80                 | to 80                | $\beta$ -glucosidase                                                | 95               |
| <i>Aureobasidium pullulans</i>     | $\beta$ -xylosidase       | 7.3                      | -                | -                    | 4.5        | 2-9.5        | 80                 | to 70                | None                                                                | 109              |
| <i>Chaetomonium cellulolyticum</i> | Xylanase 3                | 0.03                     | -                | -                    | 6-7        | -            | 50                 | -                    | Xylanase                                                            | 47               |
|                                    |                           |                          |                  |                      |            |              |                    |                      | Arabinosidase<br>Endoglucanase                                      |                  |
|                                    |                           |                          |                  |                      |            |              |                    |                      | Xylanase<br>Endoglucanase<br>Exoglucanase                           | 3                |
| <i>Fusarium oxysporum</i>          | Xylanase                  | 0.5                      | -                | -                    | 7.4        | 5.8-8.2      | 50                 | to 50                | Xylanase<br>Endoglucanase<br>Exoglucanase                           |                  |
| <i>Fusarium proliferatum</i>       | $\beta$ -xylosidase       | 53                       | 0.77             | -                    | 4.5        | -            | 60                 | -                    | None                                                                | 110              |
| <i>Fusarium verticillioides</i>    | $\beta$ -xylosidase       | 57                       | 0.85             | -                    | 4.5        | -            | 65                 | -                    | None                                                                | 111              |
| <i>Humicola grisea</i>             | $\beta$ -glucosidase 1    | 4.38                     | -                | -                    | 4.5        | 4-12         | 60-65              | 30-60                | $\beta$ -glucosidase<br>$\beta$ -galactosidase<br>Cellobiohydrolase | 6                |
|                                    | $\beta$ -glucosidase 2    | 0.07                     | -                | -                    | 6-8        | 4-12         | 60-65              | 30-50                | $\beta$ -glucosidase<br>$\beta$ -galactosidase<br>Cellobiohydrolase | 6                |
|                                    | $\beta$ -glucosidase 3    | 0.08                     | -                | -                    | 6-8        | 4-12         | 60-65              | 30-50                | $\beta$ -glucosidase<br>$\beta$ -galactosidase<br>Cellobiohydrolase | 6                |

|                                   |                        |         |       |       |       |      |       |       |                                                                                    |     |
|-----------------------------------|------------------------|---------|-------|-------|-------|------|-------|-------|------------------------------------------------------------------------------------|-----|
|                                   | $\beta$ -glucosidase 4 | 0.21    | -     | -     | 6-7   | 4-12 | 50-55 | 30-50 | $\beta$ -glucosidase<br>$\beta$ -galactosidase<br>Cellobiohydrolase                | 6   |
|                                   | $\beta$ -glucosidase 5 | 0.36    | -     | -     | 6     | 4-12 | 60    | 30-55 | $\beta$ -glucosidase<br>$\beta$ -galactosidase<br>Cellobiohydrolase                | 6   |
|                                   | $\beta$ -glucosidase 6 | 0.17    | -     | -     | 6-7   | 4-12 | 65-70 | 30-65 | $\beta$ -glucosidase<br>$\beta$ -galactosidase<br>Cellobiohydrolase                | 6   |
|                                   | $\beta$ -xylosidase    | 19.6    | 1.37  | 13    | 6.5   | 4-9  | 55    | to 50 | None                                                                               | 112 |
| <i>Neocallimastix frontalis</i>   | $\beta$ -xylosidase    | 4.3     | 0.33  | -     | 6.5   | -    | 35    | -     | Xylanase                                                                           | 113 |
|                                   | $\beta$ -xylosidase    | 0.9     | 2.98  | 0.27  | 6.4   | -    | 37    | to 40 | $\beta$ -glucosidase<br>Arabinosidase                                              | 96  |
|                                   | $\beta$ -xylosidase    | 16      | 0.34  | -     | 6.5   | 5-8  | 35    | to 40 | None                                                                               | 98  |
| <i>Neocallimastix patriciarum</i> | $\beta$ -xylosidase I  | 30.4    | 0.59  | 38    | 6     | 5-8  | 50    | 45-60 | Arabinosidase                                                                      | 114 |
|                                   | $\beta$ -xylosidase II | 8.7     | 0.13  | 8.9   | 6     | 5-7  | 40    | 25-45 | None                                                                               | 114 |
| <i>Neurospora crassa</i>          | $\beta$ -xylosidase    | 0.26    | 0.047 | -     | 4.5-5 | -    | 55    | -     | Cellobiohydrolase                                                                  | 115 |
| <i>Penicillium wortmanni</i>      | Xylosidase 1           | 22      | 4.2   | 42.6  | 3-4.5 | -    | 55-65 | -     | None                                                                               | 116 |
|                                   | Xylosidase 2           | 40      | 2.3   | 73.2  | 3-4.5 | -    | 55-65 | -     | None                                                                               | 116 |
|                                   | Xylosidase 3           | 61.5    | 1.0   | 88.2  | 3-4.5 | -    | 55-65 | -     | None                                                                               | 116 |
|                                   | Xylosidase 4           | 30.5    | 3.3   | 106.6 | 3-4.5 | -    | 55-65 | -     | None                                                                               | 116 |
| <i>Pichia pastoris X-33</i>       | EXG1                   | 11.6    | -     | -     | -     | -    | -     | -     | $\beta$ -glucosidase<br>$\beta$ -galactosidase                                     | 15  |
| <i>Piromyces communis</i>         | $\beta$ -xylosidase    | 28      | 0.4   | -     | 6.0   | 5-8  | 39    | to 40 | None                                                                               | 98  |
| <i>Sphaeromonas communis</i>      | $\beta$ -xylosidase    | 27      | 0.36  | -     | 6.5   | 5-8  | 39    | to 40 | None                                                                               | 98  |
| <i>Talaomyces emersonii</i>       | Xyl I                  | 3.0     | 0.13  | -     | 2.5   | -    | 60    | -     | None                                                                               | 117 |
|                                   | Xyl II                 | 92.9    | 32.9  | -     | 4.2   | -    | 78    | -     | None                                                                               | 117 |
|                                   | Xyl III                | 0.2     | 1.4   | -     | 3.5   | -    | 67    | -     | None                                                                               | 117 |
| <i>Trichoderma harzianum</i>      | $\beta$ -xylosidase    | 3.42    | 0.103 | -     | 4-4.5 | -    | 60    | -     | $\beta$ -glucosidase<br>$\beta$ -galactosidase<br>Arabinosidase                    | 103 |
| <i>Trichoderma reesei</i>         | CBHII                  | 0.00001 | -     | -     | -     | -    | -     | -     | $\beta$ -glucosidase<br>Mannanase<br>Xylanase<br>Cellobiohydrolase                 | 22  |
|                                   | EGI                    | 0.00001 | -     | -     | -     | -    | -     | -     | Exoglucanase<br>$\beta$ -glucosidase<br>Mannanase<br>Xylanase<br>Cellobiohydrolase | 22  |
|                                   | XYL 9                  | 0.00002 | -     | -     | -     | -    | -     | -     | Exoglucanase<br>$\beta$ -glucosidase<br>Mannanase<br>Xylanase                      | 22  |

|                                              |                      |         |        |     |     |         |    |       |                                                                            |                                                                |                   |
|----------------------------------------------|----------------------|---------|--------|-----|-----|---------|----|-------|----------------------------------------------------------------------------|----------------------------------------------------------------|-------------------|
|                                              | XYL 5.5              | 0.00005 | -      | -   | -   | -       | -  | -     | -                                                                          | $\beta$ -glucosidase<br>Mannanase<br>Xylanase<br>Arabinosidase | 22<br><br><br>118 |
|                                              | $\beta$ -xylosidase  | 470     | 0.08   | -   | 4   | 3-7     | 60 | to 55 |                                                                            |                                                                | 119               |
| <i>Trichoderma viride</i>                    | $\beta$ -xylosidase  | 10.8    | -      | -   | 3.5 | 4-5     | 55 | to 65 | None                                                                       |                                                                | 120               |
| <i>Bacillus halodurans</i> C-125             | BH1068               | -       | 30.1   | -   | 6.5 | 5-7     | 47 | to 45 | None                                                                       |                                                                | 121               |
| <i>Bacillus stearothermophilus</i>           | $\beta$ -xylosidase  | 34.2    | 0.0012 | -   | 6   | 6-8     | 70 | to 60 | None                                                                       |                                                                | 122               |
| <i>Bacillus thermantarcticus</i>             | $\beta$ -xylosidase  | 160     | 0.5    | -   | 6.0 | -       | 70 | to 60 | None                                                                       |                                                                | 123               |
| <i>Butyrivibrio fibrisolvens</i>             | xylB                 | 8.9     | -      | -   | -   | -       | -  | -     | Arabinosidase                                                              |                                                                | 124               |
| <i>Caulobacter crescentus</i>                | CcXynB2              | 215     | 9.3    | 402 | 6   | 4.5-7.5 | 55 | to 50 | None                                                                       |                                                                | 62                |
| <i>Clostridium stercorarium</i>              | $\beta$ -glucosidase | 5.7     | -      | -   | 5.5 | 5-7     | 65 | to 75 | $\beta$ -glucosidase<br>Cellobiohydrolase<br>Exoglucanase<br>Arabinosidase |                                                                | 125               |
|                                              | xylA                 | 3.5     | 2.5    | 5.9 | 7   | 5-10    | 65 | -     |                                                                            |                                                                | 126,127           |
| <i>Geobacillus stearothermophilus</i>        | $\beta$ -xylosidase  | 133     | 2.38   | 147 | 6.5 | 5.5-7   | 70 | 50-70 | None                                                                       |                                                                | 43                |
| <i>Ruminococcus flavefaciens</i>             | Exo A                | 0.01    | -      | -   | 5   | 4.5-5.5 | -  | -     | Cellobiohydrolase<br>Exoglucanase                                          |                                                                | 128               |
| <i>Thermoanaerobacterium saccharolyticum</i> | $\beta$ -xylosidase  | 53.8    | 28     | 276 | 6   | 6-6.5   | 65 | to 67 | None                                                                       |                                                                | 129               |
| <i>Thermoanaerobacter</i> sp.                | $\beta$ -xylosidase  | 66      | 0.038  | 183 | 5.9 | 5-8.5   | 93 | to 86 | Arabinosidase                                                              |                                                                | 130               |
| <i>Hordeum vulgare</i>                       | $\beta$ -xylosidase  | 6.06    | -      | -   | -   | -       | -  | -     | Arabinosidase                                                              |                                                                |                   |

**Table S7. Properties of enzymes with xylanase activity.** Table is organized by origin, fungal, then bacterial, then plant. All values listed are from enzymatic activities against xylan. “-”, not reported in the study. Rows of anaerobic fungi are highlighted.

| Origin                             | Protein Name (Annotation) | Specific Activity (U/mg) | Kinetics Km (mg/mL) | Kinetics Vmax (U/mg) | Optimal pH | pH Stability | Optimal Temp. (°C) | Temp. Stability (°C) | Other Activities                                                  | Ref.       |
|------------------------------------|---------------------------|--------------------------|---------------------|----------------------|------------|--------------|--------------------|----------------------|-------------------------------------------------------------------|------------|
| <i>Orpinomyces</i> sp. strain C1A  | XYL11                     | 73.5                     | 0.024               | 370                  | 5          | 3-9          | 50                 | 4-60                 | β-glucosidase                                                     | This Study |
|                                    | EG5                       | 9.37                     | 0.035               | 36.5                 | 7          | 3-8          | 50                 | 4-50                 | Endoglucanase                                                     | This Study |
|                                    | Bgxl                      | 10.8                     | 0.038               | 25.6                 | 6          | 4-12         | 39                 | 4-70                 | β-glucosidase<br>β-glucosidase<br>β-xylosidase<br>β-galactosidase | 91         |
| <i>Acrophialophora nainiana</i>    | Xyn III                   | 31.25                    | 4.37                | 0.24                 | 6.5        | -            | 50                 | to 55                | None                                                              | 131        |
|                                    | Xyn II                    | 33.2                     | 40.9                | -                    | 7          | -            | 55                 | to 55                | None                                                              | 132        |
|                                    | Xyn I                     | 13.6                     | 0.731               | -                    | 6          | -            | 50-60              | to 50                | None                                                              | 133        |
| <i>Aspergillus awamori</i>         | β-xylosidase              | 1.7                      | -                   | -                    | 6.5        | -            | 70                 | to 70                | β-xylosidase                                                      | 104        |
| <i>Aspergillus niger</i>           | Xylanase I                | 18.9                     | -                   | -                    | 6-6.5      | -            | 65-80              | to 80                | Exoglucanase                                                      | 93         |
|                                    | Xylanase IA               | 35.2                     | -                   | -                    | 5.5-6      | -            | 65-80              | to 80                | Exoglucanase                                                      | 93         |
|                                    | Xylanase II               | 24.5                     | -                   | -                    | 4-4.5      | -            | 65-80              | to 80                | None                                                              | 93         |
|                                    | Xylanase IIA              | 48.0                     | -                   | -                    | 4          | -            | 65-80              | to 80                | None                                                              | 93         |
| <i>Chaetomonium cellulolyticum</i> | Xylanase 1                | 22                       | -                   | -                    | 6-7        | -            | 50                 | -                    | Endoglucanase                                                     | 47         |
|                                    | Xylanase 2                | 18                       | -                   | -                    | 6-7        | -            | 50                 | -                    | Exoglucanase                                                      | 47         |
|                                    | Xylanase 3                | 11                       | -                   | -                    | 6-7        | -            | 50                 | -                    | Endoglucanase<br>Arabinosidase                                    | 47         |
| <i>Chrysosporium lucknowense</i>   | EG28                      | 0.2                      | -                   | -                    | 4.5-6      | 5-7          | 60-70              | 60-75                | Endoglucanase                                                     | 2          |
|                                    | EG44                      | 0.07                     | -                   | -                    | 4.5-6      | 5-7          | 60-70              | 60-75                | Exoglucanase                                                      | 2          |
|                                    | EG47                      | 0.08                     | -                   | -                    | 4.5-6      | 5-8.5        | 60-70              | 60-75                | Endoglucanase                                                     | 2          |
|                                    | EG51                      | 0.18                     | -                   | -                    | 4.5-6      | 5-7          | 60-70              | 60-75                | Exoglucanase                                                      | 2          |
|                                    | CBHII                     | 1.4                      | -                   | -                    | 4.5-6      | 5-7          | 60-70              | 60-75                | Endoglucanase<br>Cellobiohydrolase                                | 2          |
| <i>Fusarium oxysporum</i>          | Xylanase                  | 5.2                      | 3.8                 | -                    | 7.4        | 5.8-8.2      | 50                 | to 50                | Endoglucanase                                                     | 3          |
| <i>Gloephyllum trabeum</i>         | Cel5A                     | 0.77                     | -                   | -                    | -          | -            | -                  | -                    | Exoglucanase                                                      | 5          |
|                                    | Xyn10A                    | 390                      | -                   | -                    | -          | -            | -                  | -                    | Endoglucanase<br>Exoglucanase                                     | 5          |

|                                 |           |        |       |      |         |         |       |       |                                                              |     |
|---------------------------------|-----------|--------|-------|------|---------|---------|-------|-------|--------------------------------------------------------------|-----|
|                                 | Cell2A    | 0.88   | -     | -    | -       | -       | -     | -     | Endoglucanase<br>Exoglucanase                                | 5   |
| <i>Humicola grisea</i>          | X1        | -      | 7.233 | -    | 5       | -       | 50    | to 50 | None                                                         | 134 |
|                                 | X2        | 10.23  | 10.87 | -    | 4.5-6.5 | -       | 55-60 | to 60 | None                                                         | 134 |
|                                 | Xylanase  | 169.4  | 3.3   | 229  | 5.5     | -       | 70    | to 50 | None                                                         | 135 |
| <i>Neocallimastix frontalis</i> | Xylanase  | 0.36   | 1.13  | -    | 6       | 3-8     | 50    | to 40 | None                                                         | 136 |
| <i>Orpinomyces joyonii</i>      | Cellulase | 5.2    | -     | -    | 5.5     | 5-7.5   | 40    | to 50 | Exoglucanase<br>Endoglucanase<br>Cellobiohydrolase           | 49  |
| <i>Paecilomyces thermophila</i> | Xylanase  | 2063   | 2     | 2344 | 7       | 6-10    | 75-80 | to 75 | None                                                         | 137 |
| <i>Penicillium brasilianum</i>  | XYL       | 279    | -     | -    | -       | -       | -     | -     | None                                                         | 13  |
| <i>Penicillium citrinum</i>     | Xylanase  | 360.7  | -     | -    | 8.5     | 4-10    | 50    | 0-60  | None                                                         | 138 |
| <i>Piromyces communis</i>       | Xylanase  | 0.37   | 1     | -    | 5.5     | -       | 50    | -     | None                                                         | 136 |
| <i>Sphaeromonas communis</i>    | Xylanase  | 0.43   | 0.98  | -    | 6       | -       | 50    | -     | None                                                         | 136 |
| <i>Trichoderma harzianum</i>    | XYL2      | -      | 13.66 | -    | 5       | 3.5-6.5 | 45    | to 50 | None                                                         | 139 |
|                                 | Xylanase  | 2400   | -     | -    | -       | -       | -     | -     | None                                                         | 140 |
| <i>Trichoderma reesei</i>       | EG I      | 0.55   | -     | -    | -       | -       | -     | -     | Endoglucanase<br>Cellobiohydrolase                           | 60  |
|                                 | EG II     | 0.003  | -     | -    | -       | -       | -     | -     | $\beta$ -glucosidase<br>Endoglucanase<br>Cellobiohydrolase   | 60  |
|                                 | CBH I     | 0.0003 | -     | -    | -       | -       | -     | -     | $\beta$ -glucosidase<br>Endoglucanase<br>Cellobiohydrolase   | 60  |
|                                 | CBH II    | 0.002  | -     | -    | -       | -       | -     | -     | $\beta$ -glucosidase<br>Endoglucanase<br>Cellobiohydrolase   | 60  |
|                                 | CBH III   | 0.0002 | -     | -    | -       | -       | -     | -     | $\beta$ -glucosidase<br>Endoglucanase<br>$\beta$ -xylosidase | 22  |
|                                 | EG I      | 0.29   | -     | -    | -       | -       | -     | -     | Endoglucanase<br>$\beta$ -glucosidase<br>$\beta$ -xylosidase | 22  |
|                                 | XYL 9     | 11.33  | -     | -    | -       | -       | -     | -     | Endoglucanase<br>$\beta$ -glucosidase<br>$\beta$ -xylosidase | 22  |
|                                 | XYL 5.5   | 3.855  | -     | -    | -       | -       | -     | -     | Endoglucanase<br>$\beta$ -glucosidase<br>$\beta$ -xylosidase | 22  |
|                                 | EG I      | 46.2   | -     | -    | 4       | 2-8     | 60    | to 45 | Endoglucanase<br>Exoglucanase                                | 23  |

|                                     |              |        |      |        |       |         |       |        |                                                                            |     |
|-------------------------------------|--------------|--------|------|--------|-------|---------|-------|--------|----------------------------------------------------------------------------|-----|
| <i>Anaerocellum thermophilum</i>    | CelA         | 0.372  | -    | -      | 5-6   | -       | 85-95 | -      | Endoglucanase<br>Exoglucanase<br>Cellobiohydrolase                         | 26  |
| <i>Bacillus amyoliquefaciens</i>    | Cellulase    | 22.5   | -    | -      | 7     | 4-9     | 50    | 40-80  | Endoglucanase<br>Exoglucanase<br>Cellobiohydrolase<br>$\beta$ -glucosidase | 27  |
| <i>Bacillus circulans</i>           | XylA         | 2039.5 | 4    | 2667   | 6-6.5 | 4-8     | 75-80 | to 65  | None                                                                       | 141 |
|                                     | XylB         | 6423   | 25   | 200000 | 6-6.5 | 4-8     | 65-70 | to 65  | None                                                                       | 141 |
| <i>Bacillus licheniformis</i>       | Xylanase     | 28.7   | 3.33 | 111    | 6-7.5 | 5-8     | 60    | to 60  | None                                                                       | 142 |
| <i>Bacillus stearothermophilus</i>  | Xylanase     | 122    | 3.8  | -      | 7     | 5-11    | 60    | to 60  | None                                                                       | 121 |
| <i>Bacillus subtilis</i>            | Cellulase    | 980    | -    | -      | 6     | 6-7.5   | 50-60 | to 50  | Endoglucanase                                                              | 32  |
| <i>Bacillus thermantarcticus</i>    | Xylanase     | 141    | 1.6  | -      | 5.6   | -       | 80    | to 60  | None                                                                       | 122 |
| <i>Caldibacillus cellulovorans</i>  | CMCase       | 4.56   | -    | -      | 6.5-7 | -       | 80    | to 70  | Endoglucanase<br>Exoglucanase                                              | 33  |
| <i>Cellulomonas fimi</i>            | Exg          | 37     | -    | -      | 6     | 5-9     | -     | 60-75  | Endoglucanase<br>Cellobiohydrolase                                         | 61  |
| <i>Clostridium stercorarium</i>     | Avicelase II | 0.340  | -    | -      | 5-6   | 4.5-7   | 75    | 65-80  | Exoglucanase                                                               | 38  |
| <i>Streptomyces lividans</i>        | Xylanase     | 364    | 0.78 | 850    | 6     | 5.5-7   | 60    | 0-37   | None                                                                       | 143 |
| <i>Streptomyces rameus</i>          | Xylanase     | 4326   | 5.8  | -      | 5.3   | 4.3-6.7 | 70    | 40-65  | None                                                                       | 144 |
| <i>Streptomyces thermoviolaceus</i> | STX-I        | 1460   | -    | -      | 7     | 5-9     | 70    | to 50  | None                                                                       | 145 |
|                                     | STX-II       | 1405   | -    | -      | 7     | 5-9     | 60    | to 60  | None                                                                       | 145 |
| <i>Thermatoga maritima</i>          | CelA         | 2.5    | -    | -      | 5     | 4-9     | 85-90 | to 95  | Endoglucanase<br>Exoglucanase<br>Cellobiohydrolase                         | 65  |
|                                     | CelB         | 0.008  | -    | -      | 7     | 5-9     | 85-90 | to 95  | Endoglucanase<br>Exoglucanase<br>Cellobiohydrolase                         | 65  |
| <i>Thermatoga neapolitana</i>       | CelB         | 37     | -    | -      | 6-6.6 | -       | 106   | to 106 | Endoglucanase<br>Exoglucanase<br>Cellobiohydrolase                         | 21  |

## Supplemental Information References

- 1 Bagga, P. S., Sandhu, D. K. & Sharma, S. Purification and characterization of cellulolytic enzymes produced by *Aspergillus nidulans*. *J Appl Bacteriol* **68**, 61-68, doi:DOI 10.1111/j.1365-2672.1990.tb02549.x (1990).
- 2 Bukhtojarov, F. E. *et al.* Cellulase complex of the fungus *Chrysosporium lucknowense*: Isolation and characterization of endoglucanases and cellobiohydrolases. *Biochemistry* **69**, 542-551, doi:Doi 10.1023/B:Biry.0000029853.34093.13 (2004).
- 3 Christakopoulos, P., Kekos, D., Macris, B. J., Claeysens, M. & Bhat, M. K. Purification and characterisation of a major xylanase with cellulase and transferase activities from *Fusarium oxysporum*. *Carbohyd Res* **289**, 91-104, doi:Doi 10.1016/0008-6215(96)00146-2 (1996).
- 4 Wood, T. M. Cellulase of *Fusarium solani*. *Biochem J* **121**, 353-362 (1971).
- 5 Cohen, R., Suzuki, M. R. & Hammel, K. E. Processive endoglucanase active in crystalline cellulose hydrolysis by the brown rot basidiomycete *Gloeophyllum trabeum*. *Appl Environ Microbiol* **71**, 2412-2417, doi:10.1128/Aem.71.5.2412-2417.2005 (2005).
- 6 Takashima, S., Nakamura, A., Masaki, H. & Uozumi, T. Purification and characterization of cellulases from *Humicola grisea*. *Biosci Biotech Bioch* **60**, 77-82 (1996).
- 7 Wang, H. C., Chen, Y. C., Huang, C. T. & Hseu, R. S. Cloning and characterization of a thermostable and pH-stable cellobiohydrolase from *Neocallimastix patriciarum* J11. *Protein Expres Purif* **90**, 153-159, doi:10.1016/j.pep.2013.06.004 (2013).
- 8 Xue, G. P., Orpin, C. G., Gobius, K. S., Aylward, J. H. & Simpson, G. D. Cloning and expression of multiple cellulase cDNAs from the anaerobic rumen fungus *Neocallimastix patriciarum* in *Escherichia coli*. *J Gen Microbiol* **138**, 1413-1420 (1992).
- 9 Xue, G. P., Gobius, K. S. & Orpin, C. G. A novel polysaccharide hydrolase Cdna (Celd) from *Neocallimastix patriciarum* encoding 3 multifunctional catalytic domains with high endoglucanase, cellobiohydrolase and xylanase activities. *J Gen Microbiol* **138**, 2397-2403 (1992).
- 10 Liu, J. H. *et al.* An endoglucanase from the anaerobic fungus *Orpinomyces joyonii*: characterization of the gene and its product. *Can J Microbiol* **43**, 477-485 (1997).
- 11 Li, X. L., Chen, H. Z. & Ljungdahl, L. G. Two cellulases, CelA and CelC, from the polycentric anaerobic fungus *Orpinomyces* strain PC-2 contain N-terminal docking domains for a cellulase-hemicellulase complex. *Appl Environ Microbiol* **63**, 4721-4728 (1997).
- 12 Chen, Y. C., Chen, W. T., Liu, J. C., Tsai, L. C. & Cheng, H. L. A highly active beta-glucanase from a new strain of rumen fungus *Orpinomyces* sp.Y102 exhibits cellobiohydrolase and cellotriohydrolase activities. *Bioresource Technol* **170**, 513-521, doi:10.1016/j.biortech.2014.08.016 (2014).
- 13 Jorgensen, H., Eriksson, T., Borjesson, J., Tjerneld, F. & Olsson, L. Purification and characterization of five cellulases and one xylanase from *Penicillium brasilianum* IBT 20888. *Enzyme Microb Tech* **32**, 851-861, doi:10.1016/S0141-0229(03)00056-5 (2003).
- 14 Wood, T. M. & McCrae, S. I. Purification and some properties of a (1- $\beta$ )-D-glucan glucohydrolase associated with the cellulase from the fungus *Penicillium funiculosum*. *Carbohyd Res* **110**, 291-303, doi:Doi 10.1016/0008-6215(82)84011-1 (1982).
- 15 Xu, Z., Shih, M. C. & Poulton, J. E. An extracellular exo-beta-(1,3)-glucanase from *Pichia pastoris*: purification, characterization, molecular cloning, and functional expression. *Protein Expr Purif* **47**, 118-127, doi:10.1016/j.pep.2005.11.025 (2006).



- 16 Chu, C. Y., Tseng, C. W., Yueh, P. Y., Duan, C. H. & Liu, J. R. Molecular cloning and characterization of a beta-glucanase from *Piromyces rhizinflatus*. *J Biosci Bioeng* **111**, 541-546, doi:10.1016/j.jbiosc.2011.01.009 (2011).
- 17 Harhangi, H. R. *et al.* Cel6A, a major exoglucanase from the cellulosome of the anaerobic fungi *Piromyces* sp. E2 and *Piromyces equi*. *Biochim Biophys Acta* **1628**, 30-39 (2003).
- 18 Rouland, C., Civas, A., Renoux, J. & Petek, F. Purification and properties of cellulases from the termite *Macrotermes mulleri* (Termitidae, Macrotermitinae) and its symbiotic fungus *Termitomyces* sp. *Comp Biochem Phys B* **91**, 449-458, doi:Doi 10.1016/0305-0491(88)90004-1 (1988).
- 19 Ahmed, S., Bashir, A., Saleem, H., Saadia, M. & Jamil, A. Production and purification of cellulose-degrading enzymes from a filamentous fungus *Trichoderma harzianum*. *Pak J Bot* **41**, 1411-1419 (2009).
- 20 Thrane, C., Tronsmo, A. & Jensen, D. F. Endo-1,3-beta-glucanase and cellulase from *Trichoderma harzianum*: purification and partial characterization, induction of and biological activity against plant pathogenic *Pythium* spp. *Eur J Plant Pathol* **103**, 331-344, doi:Doi 10.1023/A:1008679319544 (1997).
- 21 Bok, J. D., Yernool, D. A. & Eveleigh, D. E. Purification, characterization, and molecular analysis of thermostable cellulases CelA and CelB from *Thermotoga neapolitana*. *Appl Environ Microbiol* **64**, 4774-4781 (1998).
- 22 Bailey, M. J., Siikaaho, M., Valkeajarvi, A. & Penttila, M. E. Hydrolytic properties of 2 cellulases of *Trichoderma reesei* expressed in yeast. *Biotechnol Appl Bioc* **17**, 65-76 (1993).
- 23 Takashima, S. *et al.* Overproduction of recombinant *Trichoderma reesei* cellulases by *Aspergillus oryzae* and their enzymatic properties. *J Biotechnol* **65**, 163-171, doi:Doi 10.1016/S0168-1656(98)00084-4 (1998).
- 24 Tomme, P. *et al.* Studies of the cellulolytic system of *Trichoderma reesei* qm-9414 - analysis of domain function in 2 cellobiohydrolases by limited proteolysis. *Eur J Biochem* **170**, 575-581, doi:DOI 10.1111/j.1432-1033.1988.tb13736.x (1988).
- 25 Zhou, J. *et al.* Identification and purification of the main components of cellulases from a mutant strain of *Trichoderma viride* T 100-14. *Bioresource Technol* **99**, 6826-6833, doi:10.1016/j.biortech.2008.01.077 (2008).
- 26 Zverlov, V., Mahr, S., Riedel, K. & Bronnenmeier, K. Properties and gene structure of a bifunctional cellulolytic enzyme (CelA) from the extreme thermophile '*Anaerocellum thermophilum*' with separate glycosyl hydrolase family 9 and 48 catalytic domains. *Microbiol* **144**, 457-465 (1998).
- 27 Lee, Y. J. *et al.* Purification and characterization of cellulase produced by *Bacillus amyoliquefaciens* DL-3 utilizing rice hull. *Bioresource Technol* **99**, 378-386, doi:10.1016/j.biortech.2006.12.013 (2008).
- 28 Mawadza, C., Hatti-Kaul, R., Zvauya, R. & Mattiasson, B. Purification and characterization of cellulases produced by two *Bacillus* strains. *J Biotechnol* **83**, 177-187, doi:Doi 10.1016/S0168-1656(00)00305-9 (2000).
- 29 Ito, S. Alkaline cellulases from alkaliphilic *Bacillus*: Enzymatic properties, genetics, and application to detergents. *Extremophiles* **1**, 61-66, doi:DOI 10.1007/s007920050015 (1997).

- 30 Han, S. J., Yoo, Y. J. & Kang, H. S. Characterization of a bifunctional cellulase and its structural gene - the Cel gene of *Bacillus* sp D04 has exoglucanase and endoglucanase activity. *J Biol Chem* **270**, 26012-26019 (1995).
- 31 Singh, J., Batra, N. & Sobti, R. C. Purification and characterisation of alkaline cellulase produced by a novel isolate, *Bacillus sphaericus* JS1. *J Ind Microbiol Biot* **31**, 51-56, doi:10.1007/s10295-004-0114-0 (2004).
- 32 Yin, L. J., Lin, H. H. & Xiao, Z. R. Purification and characterization of a cellulase from *Bacillus subtilis* yj1. *J Mar Sci Tech* **18**, 466-471 (2010).
- 33 Huang, X. P. & Monk, C. Purification and characterization of a cellulase (CMCase) from a newly isolated thermophilic aerobic bacterium *Caldibacillus cellulovorans* gen. nov., sp nov. *World J Microb Biot* **20**, 85-92, doi:Doi 10.1023/B:Wibi.0000013316.12730.E7 (2004).
- 34 MacLeod, A. M., Lindhorst, T., Withers, S. G. & Warren, R. A. The acid/base catalyst in the exoglucanase/xylanase from *Cellulomonas fimi* is glutamic acid 127: evidence from detailed kinetic studies of mutants. *Biochemistry* **33**, 6371-6376 (1994).
- 35 Nikolova, P. V., Creagh, A. L., Duff, S. J. & Haynes, C. A. Thermostability and irreversible activity loss of exoglucanase/xylanase Cex from *Cellulomonas fimi*. *Biochemistry* **36**, 1381-1388, doi:10.1021/bi962367f (1997).
- 36 Tomme, P., Kwan, E., Gilkes, N. R., Kilburn, D. G. & Warren, R. A. Characterization of CenC, an enzyme from *Cellulomonas fimi* with both endo- and exoglucanase activities. *J Bacteriol* **178**, 4216-4223 (1996).
- 37 Reverbel-Leroy, C., Pages, S., Belaich, A., Belaich, J. P. & Tardif, C. The processive endocellulase CelF, a major component of the *Clostridium cellulolyticum* cellulosome: purification and characterization of the recombinant form. *J Bacteriol* **179**, 46-52 (1997).
- 38 Bronnenmeier, K., Rucknagel, K. P. & Staudenbauer, W. L. Purification and properties of a novel type of exo-1,4-beta-glucanase (avicelase II) from the cellulolytic thermophile *Clostridium stercorarium*. *Eur J Biochem* **200**, 379-385 (1991).
- 39 Arai, T. *et al.* Characterization of a cellulase containing a family 30 carbohydrate-binding module (CBM) derived from *Clostridium thermocellum* CelJ: Importance of the CBM to cellulose hydrolysis. *J Bacteriol* **185**, 504-512, doi:10.1128/Jb.185.2.504-512.2003 (2003).
- 40 Kruus, K., Wang, W. K., Ching, J. & Wu, J. H. Exoglucanase activities of the recombinant *Clostridium thermocellum* CelS, a major cellulosome component. *J Bacteriol* **177**, 1641-1644 (1995).
- 41 Ng, T. K. & Zeikus, J. G. Purification and characterization of an endoglucanase (1,4-beta-D-glucan glucanohydrolase) from *Clostridium thermocellum*. *Biochem J* **199**, 341-350 (1981).
- 42 Bakare, M. K., Adewale, I. O., Ajayi, A. & Shonukan, O. O. Purification and characterization of cellulase from the wild-type and two improved mutants of *Pseudomonas fluorescens*. *Afr J Biotechnol* **4**, 898-904 (2005).
- 43 Gardner, R. M., Doerner, K. C. & White, B. A. Purification and characterization of an exo-beta-1,4-glucanase from *Ruminococcus flavefaciens* FD-1. *J Bacteriol* **169**, 4581-4588 (1987).
- 44 MacKenzie, C. R., Bilous, D. & Johnson, K. G. Purification and characterization of an exoglucanase from *Streptomyces flavogriseus*. *Can J Microbiol* **30**, 1171-1178 (1984).

- 45 Pitson, S. M., Seviour, R. J. & McDougall, B. M. Purification and characterization of an extracellular beta-glucosidase from the filamentous fungus *Acremonium persicinum* and its probable role in beta-glucan degradation. *Enzyme Microb Tech* **21**, 182-190, doi:Doi 10.1016/S0141-0229(96)00263-3 (1997).
- 46 Saha, B. C. & Bothast, R. J. Production, purification, and characterization of a highly glucose-tolerant novel beta-glucosidase from *Candida peltata*. *Appl Environ Microbiol* **62**, 3165-3170 (1996).
- 47 Baraznenok, V. A., Becker, E. G., Ankudimova, N. V. & Okunev, N. N. Characterization of neutral xylanases from *Chaetomium cellulolyticum* and their biobleaching effect on eucalyptus pulp. *Enzyme Microb. Technol.* **25**, 651-659, doi:Doi 10.1016/S0141-0229(99)00091-5 (1999).
- 48 Takashima, S., Nakamura, A., Hidaka, M., Masaki, H. & Uozumi, T. Molecular cloning and expression of the novel fungal beta-glucosidase genes from *Humicola grisea* and *Trichoderma reesei*. *J Biochem* **125**, 728-736 (1999).
- 49 Ye, X. Y., Ng, T. B. & Cheng, K. J. Purification and characterization of a cellulase from the ruminal fungus *Orpinomyces joyonii* cloned in *Escherichia coli*. *Int J Biochem Cell B* **33**, 87-94, doi:Doi 10.1016/S1357-2725(00)00068-6 (2001).
- 50 Chen, H. Z., Li, X. L., Blum, D. L. & Ljungdahl, L. G. Two genes of the anaerobic fungus *Orpinomyces* sp. strain PC-2 encoding cellulases with endoglucanase activities may have arisen by gene duplication. *FEMS Microbiol Lett* **159**, 63-68, doi:DOI 10.1111/j.1574-6968.1998.tb12842.x (1998).
- 51 Yang, S., Jiang, Z., Yan, Q. & Zhu, H. Characterization of a thermostable extracellular beta-glucosidase with activities of exoglucanase and transglycosylation from *Paecilomyces thermophila*. *J Agric Food Chem* **56**, 602-608, doi:10.1021/jf072279+ (2008).
- 52 Wood, T. M., Mccrae, S. I. & Macfarlane, C. C. The Isolation, purification and properties of the cellobiohydrolase component of *Penicillium funiculosum* cellulase. *Biochem J* **189**, 51-65 (1980).
- 53 Lyman, E. S., Li, B. & Renganathan, V. Purification and characterization of a cellulose-binding beta-glucosidase from cellulose-degrading cultures of *Phanerochaete chrysosporium*. *Appl Environ Microbiol* **61**, 2976-2980 (1995).
- 54 Eberhardt, R. Y., Gilbert, H. J. & Hazlewood, G. P. Primary sequence and enzymic properties of two modular endoglucanases, Cel5A and Cel45A, from the anaerobic fungus *Piromyces equi*. *Microbiol* **146**, 1999-2008 (2000).
- 55 Bhat, K. M., Gaikwad, J. S. & Maheshwari, R. Purification and characterization of an extracellular beta-glucosidase from the thermophilic fungus *Sporotrichum thermophile* and its influence on cellulase activity. *J Gen Microbiol* **139**, 2825-2832 (1993).
- 56 Amouri, B. & Gargouri, A. Characterization of a novel beta-glucosidase from a *Stachybotrys* strain. *Biochem Eng J* **32**, 191-197, doi:10.1016/j.bej.2006.09.022 (2006).
- 57 Wood, T. M. & Mccrae, S. I. Purification and some properties of the extracellular beta-D-glucosidase of the cellulolytic fungus *Trichoderma koningii*. *J Gen Microbiol* **128**, 2973-2982 (1982).
- 58 Irwin, D. C., Spezio, M., Walker, L. P. & Wilson, D. B. Activity studies of 8 purified cellulases - specificity, synergism, and binding domain effects. *Biotechnol Bioeng* **42**, 1002-1013, doi:DOI 10.1002/bit.260420811 (1993).

- 59 Woodward, J., Brown, J. P., Evans, B. R. & Affholter, K. A. Papain digestion of crude *Trichoderma reesei* cellulase - purification and properties of cellobiohydrolase-I and cellobiohydrolase-II core proteins. *Biotechnol Appl Bioc* **19**, 141-153 (1994).
- 60 Suurnakki, A. *et al.* *Trichoderma reesei* cellulases and their core domains in the hydrolysis and modification of chemical pulp. *Cellulose* **7**, 189-209, doi:Doi 10.1023/A:1009280109519 (2000).
- 61 Curry, C., Gilkes, N., O'Neill, G., Miller, R. C. & Skipper, N. Expression and secretion of a *Cellulomonas fimi* exoglucanase in *Saccharomyces cerevisiae*. *Appl Environ Microbiol* **54**, 476-484 (1988).
- 62 Bronnenmeier, K. & Staudenbauer, W. L. Purification and properties of an extracellular beta-glucosidase from the cellulolytic thermophile *Clostridium stercorarium*. *Appl Microbiol Biot* **28**, 380-386 (1988).
- 63 Ait, N., Creuzet, N. & Cattaneo, J. Properties of beta-glucosidase purified from *Clostridium thermocellum*. *J Gen Microbiol* **128**, 569-577 (1982).
- 64 Bronnenmeier, K., Kern, A., Liebl, W. & Staudenbauer, W. L. Purification of *Thermotoga maritima* enzymes for the degradation of cellulosic materials. *Appl Environ Microbiol* **61**, 1399-1407 (1995).
- 65 Liebl, W. *et al.* Analysis of a *Thermotoga maritima* DNA fragment encoding two similar thermostable cellulases, CelA and CelB, and characterization of the recombinant enzymes. *Microbiol-SGM* **142**, 2533-2542 (1996).
- 66 Pauly, M. *et al.* A xyloglucan-specific endo-beta-1,4-glucanase from *Aspergillus aculeatus*: expression cloning in yeast, purification and characterization of the recombinant enzyme. *Glycobiology* **9**, 93-100, doi:DOI 10.1093/glycob/9.1.93 (1999).
- 67 Akiba, S., Kimura, Y., Yamamoto, K. & Kumagai, H. Purification and characterization of a protease-resistant cellulase from *Aspergillus niger*. *J Ferment Bioeng* **79**, 125-130, doi:Doi 10.1016/0922-338x(95)94078-6 (1995).
- 68 Hurst, P. L., Nielsen, J., Sullivan, P. A. & Shepherd, M. G. Purification and properties of a cellulase from *Aspergillus niger*. *Biochem J* **165**, 33-41 (1977).
- 69 Okada, G. Purification and properties of a cellulase from *Aspergillus niger*. *Agr Biol Chem* **49**, 1257-1265 (1985).
- 70 Thongekkaew, J., Ikeda, H., Masaki, K. & Iefuji, H. An acidic and thermostable carboxymethyl cellulase from the yeast *Cryptococcus* sp S-2: Purification, characterization and improvement of its recombinant enzyme production by high cell-density fermentation of *Pichia pastoris*. *Protein Expres Purif* **60**, 140-146, doi:10.1016/j.pep.2008.03.021 (2008).
- 71 Jin, X., Meng, N. & Xia, L. M. Expression of an endo-beta-1,4-glucanase gene from *Orpinomyces* PC-2 in *Pichia pastoris*. *Int J Mol Sci* **12**, 3366-3380, doi:10.3390/ijms12053366 (2011).
- 72 Tong, C. C., Cole, A. L. & Shepherd, M. G. Purification and properties of the cellulases from the thermophilic fungus *Thermoascus aurantiacus*. *Biochem J* **191**, 83-94 (1980).
- 73 Liu, J. & Xia, W. S. Purification and characterization of a bifunctional enzyme with chitosanase and cellulase activity from commercial cellulase. *Biochem Eng J* **30**, 82-87, doi:10.1016/j.bej.2006.02.005 (2006).
- 74 Muhammad, A., Iqbal, M., Mahmood, T. & Qadir, J. Calculation and measurement of kinetic parameters of Pakistan Research Reactor-1 (PARR-1). *Ann Nucl Energy* **38**, 44-48, doi:10.1016/j.anucene.2010.08.019 (2011).

- 75 Fukumori, F., Kudo, T. & Horikoshi, K. Purification and properties of a cellulase from alkalophilic *Bacillus* sp no-1139. *J Gen Microbiol* **131**, 3339-3345 (1985).
- 76 Hakamada, Y. *et al.* Thermostable alkaline cellulase from an alkaliphilic isolate, *Bacillus* sp. KSM-S237. *Extremophiles* **1**, 151-156, doi:DOI 10.1007/s007920050028 (1997).
- 77 Kim, J. Y., Hur, S. H. & Hong, J. H. Purification and characterization of an alkaline cellulase from a newly isolated alkalophilic *Bacillus* sp HSH-810. *Biotechnol Lett* **27**, 313-316, doi:10.1007/s10529-005-0685-5 (2005).
- 78 Okoshi, H. *et al.* Purification and characterization of multiple carboxymethyl cellulases from *Bacillus* sp ksm-522. *Agr Biol Chem* **54**, 83-89 (1990).
- 79 Vijayaraghavan, P. & Vincent, S. G. P. Purification and characterization of carboxymethyl cellulase from *Bacillus* sp isolated from a paddy field. *Pol J Microbiol* **61**, 51-55 (2012).
- 80 Ariffin, H., Abdullah, N., Umi Kalsom, M. S., Shirai, Y. & Hassan, M. A. Production and characterization of cellulase by *Bacillus pumilus* EB3. *Int J Res Eng Technol* **3**, 47-53 (2006).
- 81 Li, W., Zhang, W. W., Yang, M. M. & Chen, Y. L. Cloning of the thermostable cellulase gene from newly isolated *Bacillus subtilis* and its expression in *Escherichia coli*. *Mol Biotechnol* **40**, 195-201, doi:10.1007/s12033-008-9079-y (2008).
- 82 Beguin, P. & Eisen, H. Purification and partial characterization of 3 extracellular cellulases from *Cellulomonas* sp. *Eur J Biochem* **87**, 525-531, doi:DOI 10.1111/j.1432-1033.1978.tb12403.x (1978).
- 83 Shanmughapriya, S., Kiran, G. S., Selvin, J., Thomas, T. A. & Rani, C. Optimization, purification, and characterization of extracellular mesophilic alkaline cellulase from sponge-associated *Marinobacter* sp MSI032. *Appl Biochem Biotech* **162**, 625-640, doi:10.1007/s12010-009-8747-0 (2010).
- 84 Wang, C. Y. *et al.* Purification and characterization of a novel halostable cellulase from *Salinivibrio* sp strain NTU-05. *Enzyme Microb Tech* **44**, 373-379, doi:10.1016/j.enzmictec.2009.02.006 (2009).
- 85 Chen, P. J., Wei, T. C., Chang, Y. T. & Lin, L. P. Purification and characterization of carboxymethyl cellulase from *Sinorhizobium fredii*. *Bot Bull Acad Sinica* **45**, 111-118 (2004).
- 86 Stutzenberger, F. J. Cellulolytic activity of *Thermomonospora curvata* - optimal assay conditions, partial purification, and product of cellulase. *Appl Microbiol* **24**, 83-90 (1972).
- 87 Chararas, C., Eberhard, R., Courtois, J. E. & Petek, F. Purification of 3 cellulases from the xylophageous larvae of *Ergates faber* (Coleoptera, Cerambycidae). *Insect Biochem* **13**, 213-218, doi:Doi 10.1016/0020-1790(83)90086-0 (1983).
- 88 Scrivener, A. M. & Slaytor, M. Properties of the endogenous cellulase from *Panesthia cribrata saussure* and purification of major endo-beta-1,4-glucanase components. *Insect Biochem Molec* **24**, 223-231, doi:Doi 10.1016/0965-1748(94)90001-9 (1994).
- 89 Sugimura, M., Watanabe, H., Lo, N. & Saito, H. Purification, characterization, cDNA cloning and nucleotide sequencing of a cellulase from the yellow-spotted longicorn beetle, *Psacotha hilaris*. *Eur J Biochem* **270**, 3455-3460, doi:10.1046/j.1432-1033.2003.03735.x (2003).

- 90 Lew, F. T. & Lewis, L. N. Purification and properties of cellulase from *Phaseolus vulgaris*. *Phytochemistry* **13**, 1359-1366, doi:Doi 10.1016/0031-9422(74)80292-X (1974).
- 91 Morrison, J. M., Elshahed, M. S. & Youssef, N. H. A multifunctional GH39 glycoside hydrolase from the anaerobic gut fungus *Orpinomyces* sp. strain C1A. *Plos One*, Submitted (2016).
- 92 Kitpreechavanich, V., Hayashi, M. & Nagai, S. Purification and characterization of extracellular beta-xylosidase and beta-glucosidase from *Aspergillus fumigatus*. *Agr Biol Chem* **50**, 1703-1711 (1986).
- 93 John, M., Schmidt, B. & Schmidt, J. Purification and some properties of five endo-1,4-beta-D-xylanases and a beta-D-xylosidase produced by a strain of *Aspergillus niger*. *Can J Biochem Cell B* **57**, 125-134 (1979).
- 94 vanPeij, N. N. M. E., Brinkmann, J., Vrsanska, M., Visser, J. & deGraaff, L. H. Beta-xylosidase activity, encoded by xlnD, is essential for complete hydrolysis of xylan by *Aspergillus niger* but not for induction of the xylanolytic enzyme spectrum. *Eur J Biochem* **245**, 164-173 (1997).
- 95 Hayashi, S., Ohno, T., Ito, M. & Yokoi, H. Purification and properties of the cell-associated ss-xylosidase from *Aureobasidium*. *J Ind Microbiol Biot* **26**, 276-279, doi:DOI 10.1038/sj.jim.7000120 (2001).
- 96 Garcia-Campayo, V. & Wood, T. M. Purification and characterization of a beta-D-xylosidase from the anaerobic rumen fungus *Neocallimastix frontalis*. *Carbohyd Res* **242**, 229-245, doi:Doi 10.1016/0008-6215(93)80037-F (1993).
- 97 Wilson, C. A., Mccrae, S. I. & Wood, T. M. Characterization of a beta-D-glucosidase from the anaerobic rumen fungus *Neocallimastix frontalis* with particular reference to attack on cello-oligosaccharides. *J Biotechnol* **37**, 217-227, doi:Doi 10.1016/0168-1656(94)90129-5 (1994).
- 98 Hebraud, M. & Fevre, M. Characterization of Glycoside and Polysaccharide Hydrolases Secreted by the Rumen Anaerobic Fungi *Neocallimastix-Frontalis*, *Sphaeromonas-Communis* and *Piromonas-Communis*. *J Gen Microbiol* **134**, 1123-1129 (1988).
- 99 Chen, H. Z., Li, X. L. & Ljungdahl, L. G. Isolation and properties of an extracellular beta-glucosidase from the polycentric rumen fungus *Orpinomyces* sp strain pc-2. *Appl Environ Microbiol* **60**, 64-70 (1994).
- 100 Harhangi, H. R. *et al.* A highly expressed family 1 beta-glucosidase with transglycosylation capacity from the anaerobic fungus *Piromyces* sp E2. *BBA-Gene Struct Expr* **1574**, 293-303, doi:Pii S0167-4781(01)00380-3 Doi 10.1016/S0167-4781(01)00380-3 (2002).
- 101 Meyer, H. P. & Canevascini, G. Separation and some properties of 2 intracellular beta-glucosidases of *Sporotrichum (Chrysosporium)* thermophile. *Appl Environ Microbiol* **41**, 924-931 (1981).
- 102 Parry, N. J. *et al.* Biochemical characterization and mechanism of action of a thermostable beta-glucosidase purified from *Thermoascus aurantiacus*. *Biochem J* **353**, 117-127 (2001).
- 103 Ximenes, F. D., Silveira, F. Q. D. & Ximenes, E. Production of beta-xylosidase activity by *Trichoderma harzianum* strains. *Curr Microbiol* **33**, 71-77, doi:DOI 10.1007/s002849900077 (1996).

- 104 Kormelink, F. J. M., Searle van Leeuwen, M. J. E., Wood, T. M. & Voragen, A. G. J. Purification and characterization of 3 endo-(1,4)-beta-xylanases and one beta-xylosidase from *Aspergillus awamori*. *J Biotechnol* **27**, 249-265, doi:Doi 10.1016/0168-1656(93)90089-6 (1993).
- 105 Kiss, T. & Kiss, L. Purification and characterization of an extracellular beta-D-xylosidase from *Aspergillus carbonarius*. *World J Microb Biot* **16**, 465-470, doi:Doi 10.1023/A:1008912025896 (2000).
- 106 Kumar, S. & Ramon, D. Purification and regulation of the synthesis of a beta-xylosidase from *Aspergillus nidulans*. *FEMS Microbiol Lett* **135**, 287-293, doi:DOI 10.1111/j.1574-6968.1996.tb08003.x (1996).
- 107 Rizzatti, A. C. S., Jorge, J. A., Terenzi, H. F., Rechia, C. G. V. & Polizeli, M. L. T. M. Purification and properties of a thermostable extracellular beta-D-xylosidase produced by a thermotolerant *Aspergillus phoenicis*. *J Ind Microbiol Biot* **26**, 156-160, doi:DOI 10.1038/sj.jim.7000107 (2001).
- 108 Sulisty, J., Kamiyama, Y. & Yasui, T. Purification and some properties of *Aspergillus pulverulentus* beta-xylosidase with transxylosylation capacity. *J Ferment Bioeng* **79**, 17-22, doi:Doi 10.1016/0922-338x(95)92737-W (1995).
- 109 Dobberstein, J. & Emeis, C. C. Purification and characterization of beta-xylosidase from *Aureobasidium pullulans*. *Appl Microbiol Biot* **35**, 210-215 (1991).
- 110 Saha, B. C. Purification and properties of an extracellular beta-xylosidase from a newly isolated *Fusarium proliferatum*. *Bioresource Technol* **90**, 33-38, doi:10.1016/S0960-8524(03)00098-1 (2003).
- 111 Saha, B. C. Purification and characterization of an extracellular beta-xylosidase from a newly isolated *Fusarium verticillioides*. *J Ind Microbiol Biot* **27**, 241-245, doi:DOI 10.1038/sj.jim.7000184 (2001).
- 112 Iembo, T., Azevedo, M. O., Bloch, C. & Filho, E. X. F. Purification and partial characterization of a new beta-xylosidase from *Humicola grisea* var. *thermoidea*. *World J Microb Biot* **22**, 475-479, doi:10.1007/s11274-005-9059-3 (2006).
- 113 Hebraud, M. & Fevre, M. Purification and characterization of an extracellular beta-xylosidase from the rumen anaerobic fungus *Neocallimastix frontalis*. *FEMS Microbiol Lett* **72**, 11-16, doi:DOI 10.1111/j.1574-6968.1990.tb03853.x (1990).
- 114 Zhu, H., Cheng, K. J. & Forsberg, C. W. A truncated beta-xylosidase from the anaerobic fungus *Neocallimastix patriciarum* 27. *Can J Microbiol* **40**, 484-490 (1994).
- 115 Deshpande, V., Lachke, A., Mishra, C., Keskar, S. & Rao, M. Mode of action and properties of xylanase and beta-xylosidase from *Neurospora crassa*. *Biotechnol Bioeng* **28**, 1832-1837, doi:DOI 10.1002/bit.260281210 (1986).
- 116 Matsuo, M., Fujie, A., Win, M. & Yasui, T. 4 types of beta-xylosidases from *Penicillium wortmanni* ifo-7237. *Agr Biol Chem* **51**, 2367-2379 (1987).
- 117 Tuohy, M. G., Puls, J., Claeysens, M., Vrsanska, M. & Coughlan, M. P. The xylan-degrading enzyme-system of *Talaromyces emersonii* - novel enzymes with activity against aryl beta-D-xylosides and unsubstituted xylans. *Biochem J* **290**, 515-523 (1993).
- 118 Poutanen, K. & Puls, J. Characteristics of *Trichoderma reesei* beta-xylosidase and its use in the hydrolysis of solubilized xylans. *Appl Microbiol Biot* **28**, 425-432 (1988).
- 119 Matsuo, M. & Yasui, T. Purification and some properties of beta-xylosidase from *Trichoderma viride*. *Agr Biol Chem* **48**, 1845-1852 (1984).

- 120 Wagschal, K., Franqui-Espiet, D., Lee, C. C., Robertson, G. H. & Wong, D. W. S. Cloning, expression and characterization of a glycoside hydrolase family 39 xylosidase from *Bacillus halodurans* C-125. *Appl Biochem Biotech* **146**, 69-78, doi:10.1007/s12010-007-8055-5 (2008).
- 121 Nanmori, T., Watanabe, T., Shinke, R., Kohno, A. & Kawamura, Y. Purification and properties of thermostable xylanase and beta-xylosidase produced by a newly isolated *Bacillus stearothermophilus* strain. *J Bacteriol* **172**, 6669-6672 (1990).
- 122 Lama, L., Calandrelli, V., Gambacorta, A. & Nicolaus, B. Purification and characterization of thermostable xylanase and beta-xylosidase by the thermophilic bacterium *Bacillus thermantarcticus*. *Res Microbiol* **155**, 283-289, doi:10.1016/j.resmic.2004.02.001 (2004).
- 123 Utt, E. A., Eddy, C. K., Keshav, K. F. & Ingram, L. O. Sequencing and expression of the *Butyrivibrio fibrisolvens* xylb gene encoding a novel bifunctional protein with beta-D-xylosidase and alpha-L-arabinofuranosidase activities. *Appl Environ Microbiol* **57**, 1227-1234 (1991).
- 124 Correa, J. M. *et al.* Expression and characterization of a GH39 beta-xylosidase II from *Caulobacter crescentus*. *Appl Biochem Biotech* **168**, 2218-2229, doi:10.1007/s12010-012-9931-1 (2012).
- 125 Sakka, K. *et al.* Nucleotide sequence of the *Clostridium stercorarium* xyla gene encoding a bifunctional protein with beta-D-xylosidase and alpha-L-arabinofuranosidase activities, and properties of the translated product. *Biosci Biotech Bioch* **57**, 268-272 (1993).
- 126 Bhalla, A., Bischoff, K. M. & Sani, R. K. Highly thermostable GH39 beta-xylosidase from a *Geobacillus* sp strain WSUCF1. *BMC Biotechnol* **14**, 963-973, doi:Artn 963 10.1186/S12896-014-0106-8 (2014).
- 127 Czjzek, M. *et al.* Enzyme-substrate complex structures of a GH39 beta-xylosidase from *Geobacillus stearothermophilus*. *J Mol Biol* **353**, 838-846, doi:10.1016/j.jmb.2005.09.003 (2005).
- 128 Shao, W. L. *et al.* Characterization of a bovel beta-xylosidase, XylC, from *Thermoanaerobacterium saccharolyticum* JW/SL-YS485. *Appl Environ Microbiol* **77**, 719-726, doi:10.1128/Aem.01511-10 (2011).
- 129 Shao, W. L. & Wiegel, J. Purification and characterization of a thermostable beta-xylosidase from *Thermoanaerobacter ethanolicus*. *J Bacteriol* **174**, 5848-5853 (1992).
- 130 Lee, R. C., Hrmova, M., Burton, R. A., Lahnstein, J. & Fincher, G. B. Bifunctional family 3 glycoside hydrolases from barley with alpha-L-arabinofuranosidase and beta-D-xylosidase activity - characterization, primary structures, and COOH-terminal processing. *J Biol Chem* **278**, 5377-5387, doi:10.1074/jbc.M210627200 (2003).
- 131 Cardoso, O. A. V. & Ferreira, E. X. Purification and characterization of a novel cellulase-free xylanase from *Acrophialophora nainiana*. *FEMS Microbiol Lett* **223**, 309-314, doi:10.1016/S0378-1097(03)00392-6 (2003).
- 132 Salles, B. C., Cunha, R. B., Fontes, W., Sousa, M. V. & Filho, E. X. F. Purification and characterization of a new xylanase from *Acrophialophora nainiana*. *J Biotechnol* **81**, 199-204, doi:Doi 10.1016/S0168-1656(00)00280-7 (2000).
- 133 Ximenes, F. D., de Sousa, M. V., Puls, J., da Silva, F. G. & Ferreira, E. X. Purification and characterization of a low-molecular-weight xylanase produced by *Acrophialophora nainiana*. *Curr Microbiol* **38**, 18-21, doi:Doi 10.1007/PI00006765 (1999).



- 134 Lucena-Neto, S. D. & Ferreira, E. X. Purification and characterization of a new xylanase from *Humicola grisea* var. *Thermoidea*. *Braz J Microbiol* **35**, 86-90, doi:Doi 10.1590/S1517-83822004000100014 (2004).
- 135 Monti, R., Terenzi, H. F. & Jorge, J. A. Purification and properties of an extracellular xylanase from the thermophilic fungus *Humicola grisea* var *thermoidea*. *Can J Microbiol* **37**, 675-681 (1991).
- 136 Hebraud, M. & Fevre, M. Characterization of glycoside and polysaccharide hydrolases secreted by the rumen anaerobic fungi *Neocallimastix frontalis*, *Sphaeromonas communis* and *Piromonas communis*. *J Gen Microbiol* **134**, 1123-1129 (1988).
- 137 Li, L. T., Tian, H. M., Cheng, Y. Q., Jiang, Z. Q. & Yang, S. Q. Purification and characterization of a thermostable cellulase-free xylanase from the newly isolated *Paecilomyces thermophila*. *Enzyme Microb Tech* **38**, 780-787, doi:10.1016/j.enzmictec.2005.08.007 (2006).
- 138 Dutta, T. *et al.* A novel cellulase free alkaliphilic xylanase from alkali tolerant *Penicillium citrinum*: production, purification and characterization. *Lett Appl Microbiol* **44**, 206-211, doi:10.1111/j.1472-765X.2006.02042.x (2007).
- 139 Silveira, F. Q. D. *et al.* A new xylanase from a *Trichoderma harzianum* strain. *J Ind Microbiol Biot* **23**, 682-685 (1999).
- 140 Tan, L. U. L., Yu, E. K. C., Louisseize, G. W. & Saddler, J. N. Inexpensive, rapid procedure for bulk purification of cellulase-free beta-1,4-D-xylanase of high specific activity. *Biotechnol Bioeng* **30**, 96-100, doi:DOI 10.1002/bit.260300114 (1987).
- 141 Dhillon, A., Gupta, J. K. & Khanna, S. Enhanced production, purification and characterisation of a novel cellulase-poor thermostable, alkalitolerant xylanase from *Bacillus circulans* AB 16. *Process Biochem* **35**, 849-856, doi:Doi 10.1016/S0032-9592(99)00152-1 (2000).
- 142 Archana, A. & Satyanarayana, T. Purification and characterization of a cellulase-free xylanase of a moderate thermophile *Bacillus licheniformis* A99. *World J Microb Biot* **19**, 53-57, doi:Doi 10.1023/A:1022527702400 (2003).
- 143 Morosoli, R., Bertrand, J. L., Mondou, F., Shareck, F. & Kluepfel, D. Purification and properties of a xylanase from *Streptomyces lividans*. *Biochem J* **239**, 587-592 (1986).
- 144 Li, X. T. *et al.* Purification and characterization of a cellulase-free, thermostable xylanase from *Streptomyces rameus* L2001 and its biobleaching effect on wheat straw pulp. *Biochem Eng J* **52**, 71-78, doi:10.1016/j.bej.2010.07.006 (2010).
- 145 Tsujibo, H. *et al.* Purification, properties, and partial amino-acid-sequences of thermostable xylanases from *Streptomyces thermoviolaceus* opc-520. *Appl Environ Microbiol* **58**, 371-375 (1992).
